1 **Functional and genomic adaptations of blood monocytes to pregravid**  
2 **obesity during pregnancy**

3 Running title: Maternal obesity and blood monocytes

4 Suhas Sureshchandra<sup>1,2</sup>, Nicole E. Marshall<sup>4</sup>, Norma Mendoza<sup>1</sup>, Allen Jankeel<sup>1</sup>,  
5 Michael Z. Zulu<sup>1,2</sup>, Ilhem Messaoudi<sup>1,2,3\*</sup>

6

7 <sup>1</sup> Department of Molecular Biology and Biochemistry, University of California,  
8 Irvine CA 92697

9 <sup>2</sup> Institute for Immunology, University of California, Irvine CA 92697

10 <sup>3</sup> Center for Virus Research, University of California, Irvine CA 92697

11 <sup>4</sup> Maternal-Fetal Medicine, Oregon Health and Science University, Portland OR  
12 97239

13 \*Corresponding Author:

14 Ilhem Messaoudi

15 Molecular Biology and Biochemistry

16 University of California Irvine

17 2400 Biological Sciences III

18 Irvine, CA 92697

19 Phone: 949-824-3078

20 Email: [imessaou@uci.edu](mailto:imessaou@uci.edu)

21

1 **ABSTRACT**

2 Pre-pregnancy obesity is associated with several adverse maternal health  
3 outcomes, notably increased risk of infection as well as the incidence of  
4 gestational diabetes, preeclampsia, and preterm birth. However, the mechanisms  
5 by which pregravid obesity disrupts the pregnancy associated “immune clock” are  
6 still unknown. To address this question, we collected blood samples from women  
7 during the first and third trimesters and determined the impact of both pregnancy  
8 and pregravid obesity on circulating immune mediators, immune cell subset  
9 frequencies, and peripheral immune responses. While regardless of BMI,  
10 pregnancy was associated with an elevation in both Th1 and Th2 cytokines,  
11 pregravid obesity was associated with a dysregulation in circulating myeloid  
12 factors at term. Moreover, pregnancy in lean subjects was associated with  
13 enhanced monocyte activation, augmented chromatin accessibility at  
14 inflammatory loci, and heightened responses to LPS. Pregravid obesity disrupted  
15 this trajectory and was accompanied by a lack of transcriptional and epigenetic  
16 changes and alterations in metabolic status strongly suggesting a skewing  
17 towards immunotolerance. These findings provide novel insight into the  
18 increased susceptibility to infections observed with obesity during pregnancy.

19

20

1 **KEYWORDS**

2 Pregnancy, obesity, monocytes, inflammation, chromatin, gestation, transcription,

3 epigenome, tolerance.

4

5

1 **SUMMARY**

2 A healthy pregnancy is associated with progressive innate immune activation.

3 Maternal factors such as obesity compromise this myeloid cell activation

4 trajectory at genomic, epigenomic, functional, and metabolic levels, resulting in

5 stagnant immune responses, suggestive of a state of tolerance.

6

## 1 INTRODUCTION

2           The maternal immune system undergoes several fine-tuned adaptations  
3 over the course of pregnancy (Mor and Cardenas, 2010). These changes are  
4 believed to facilitate implantation, fetal tolerance, fetal growth and development,  
5 and finally labor and parturition without compromising protection against  
6 microbial infections (Mor et al., 2011). A recently described “immunological clock”  
7 of pregnancy suggests that peripheral immune adaptations do not necessarily  
8 follow waves of pro- and anti-inflammatory phases (Mor and Cardenas, 2010),  
9 but rather a progressive activation of signaling molecules (Aghaeepour et al.,  
10 2017) and alterations in the circulating proteome (Aghaeepour et al., 2018).  
11 Specifically, while the peripheral adaptive immune system is skewed towards  
12 Th2/Treg responses and away from Th1/Th17 responses (Luppi et al., 2002b;  
13 Polese et al., 2014; Sacks et al., 2003), innate immune cells are progressively  
14 activated over the course of a healthy pregnancy (Aghaeepour et al., 2017). This  
15 activation is manifested through higher production of pro-inflammatory cytokines  
16 IL-6, IL-1 $\beta$ , and IL-12 by peripheral blood mononuclear cells (PBMC) following *ex*  
17 *vivo* stimulation with LPS and bacteria (Aghaeepour et al., 2017; Faas et al.,  
18 2014; Luppi et al., 2002a; Naccasha et al., 2001; Sacks et al., 2003; Sacks et al.,  
19 1998) or viral particles (Kay et al., 2014; Le Gars et al., 2016). However, the  
20 precise mechanisms underlying this progressive activation of the innate immune  
21 branch remain poorly defined.

22           A third of women of reproductive age in the US meet the definition of  
23 obese (body mass index (BMI)>30) (Flegal et al., 2016), making pregravid

1 obesity one of the most critical and common health challenges during pregnancy.  
2 High pregravid BMI increases the risk for gestational diabetes (Chu et al., 2007;  
3 Torloni et al., 2009), gestational hypertension, preeclampsia (Huda et al., 2014;  
4 Wang et al., 2013), early pregnancy loss, placental abruption, abnormal fetal  
5 growth, premature labor, and stillbirth (Aune et al., 2014; Kim et al., 2016). High  
6 pregravid BMI is also an independent risk for infection during pregnancy (urinary  
7 and genital tract infections, sepsis) (Sebire et al., 2001), labor (chorioamnionitis)  
8 (Cnattingius et al., 2013; Hadley et al., 2019), and post-partum (surgical site  
9 infections following cesarean) (Conner et al., 2014; McLean et al., 2012).

10       These adverse outcomes suggest a dysregulated immune status in  
11 pregnant women with obesity; but the impact of pregravid obesity on the  
12 pregnancy “immune clock” remains poorly defined. Pregravid obesity is marked  
13 by elevated circulating levels of inflammatory mediators C reactive protein (CRP)  
14 and IL-6 (Basu et al., 2011a; Sureshchandra et al., 2018), subclinical  
15 endotoxemia, and signs of heightened inflammation in the adipose tissue  
16 compartment (Basu et al., 2011a). Increased exposure to subclinical levels of  
17 LPS with obesity could potentially alter both phenotype and fitness of innate  
18 immune cells. Indeed, we recently reported dysregulation in secretion of immune  
19 mediators, especially those expressed by monocytes and dendritic cells (DCs),  
20 following *ex vivo* stimulation with TLR agonists of PBMC collected at gestational  
21 week 37 from subjects with obesity (Sureshchandra et al., 2018).

22       Amongst innate immune cells, monocytes and macrophages play critical  
23 roles at various stages of pregnancy. Circulating monocytes play seminal roles in

1 implantation, placentation, and labor, while decidual monocyte-derived  
2 macrophages play critical roles in angiogenesis, tissue development, and wound  
3 healing at the maternal fetal interface (Basu et al., 2011b; Mor and Abrahams,  
4 2003; Mor et al., 2011). Monocytes/macrophages have also been implicated in  
5 several obesity-associated complications during pregnancy such as  
6 preeclampsia (Faas et al., 2014), preterm labor (Gomez-Lopez et al., 2014), poor  
7 placental development (Faas and de Vos, 2017), and chorioamnionitis (Ben  
8 Amara et al., 2013). However, several questions still remain unaddressed: (1)  
9 how does pregravid obesity alter monocyte responses and function throughout  
10 pregnancy; (2) what are the cellular and molecular mechanisms of underlying  
11 those changes?

12 To answer these questions, in this study, we defined longitudinal changes  
13 in circulating immune mediators, peripheral innate immune cell subsets and  
14 responses of monocytes and DCs to *ex vivo* stimulation during early and late  
15 stages of gestation in both lean and obese women to elucidate the impact of  
16 pregravid obesity on the “pregnancy immunological clock” using a combination of  
17 immunological, transcriptional and epigenetic analyses. We report a gestation-  
18 associated trajectory of monocyte activation that is accompanied by an enhanced  
19 response to LPS and poising of the epigenome towards a state of heightened  
20 activation. Pregravid obesity disrupts this trajectory of monocytes’ activation,  
21 skewing them towards an immunoregulatory phenotype characterized by  
22 attenuated responses to LPS and lack of epigenetic and metabolic plasticity  
23 observed in lean pregnancy. This dysregulation in monocyte activation with

1 pregravid obesity was accompanied with systemic changes in circulating cytokine  
2 and chemokine environment consistent with a regulatory environment.  
3 Collectively, these findings provide novel insight into mechanisms by which  
4 pregravid obesity disrupt pregnancy associated adaptations that mediate  
5 tolerance while protecting the developing fetus and pregnant woman against  
6 microbial challenges.

7

8



## 1 **RESULTS**

### 2 **Pregnancy and pregravid obesity alter the circulating metabolic and** 3 **inflammatory environment.**

4 Both pre-pregnancy BMI and fat mass were recorded to stratify subjects  
5 as lean (BMI < 25) and obese (BMI >30). Patient demographics are summarized  
6 in Table 1. Pregravid BMI correlated strongly with fat mass percentages, both at  
7 T1 and T3 (Supp Figure 1A). Gestational weight gain was significantly lower in  
8 the obese group (Supp Figure 1B). We measured plasma levels of circulating  
9 metabolic hormones, adipokines, cytokines, chemokines, and growth factors at  
10 T1 and T3 (Figure 1A). At both T1 and T3, high pregravid BMI was associated  
11 with elevated circulating CRP (Figure 1B) and IL-6 (Figure 1C) levels. Systemic  
12 levels of insulin (Figure 1D) and leptin (Figure 1E) were significantly higher in the  
13 obese group at both time points. Interestingly, their levels remained unchanged in  
14 the obese group but increased with gestation in the lean group (Figures 1D and  
15 1E). Plasma levels of resistin were also higher in the obese group at both time  
16 points but did not increase with pregnancy in either group (Supp Figure 1C).  
17 Finally, plasma levels of the adipokines adipsin (Supp Figure 1D) and  
18 adiponectin (Supp Figure 1E) increased with pregnancy in both groups and no  
19 differences between the groups were noted. No differences were detected in  
20 plasma levels of gut hormone peptide YY (PYY) with either pregnancy or  
21 pregravid obesity (Supp Figure 1F).

22 Independent of maternal BMI, pregnancy was associated with shifts in the  
23 circulating inflammatory environment from T1 to T3 (Figure 1F). Levels of both

1 pro-inflammatory ( $\text{TNF}\alpha$ , IL-2,  $\text{IFN}\beta$ , IL-7, IL-17A, IL-18, IL-23) and regulatory (IL-  
2 4, IL-10, and IL-13) cytokines, as well as chemokines (CCL3, CXCL9, and  
3 CXCL11) significantly increased during pregnancy in both lean and obese groups  
4 (Figure 1F). At T1, obesity was associated with elevated levels of myeloid cell  
5 chemoattractants CCL2 (Figure 1G) and CCL4. Levels of CCL2 decreased  
6 dramatically in the obese group, but remained unchanged in the lean group, with  
7 pregnancy (Figure 1G). In contrast, levels of CCL4 as well as the pro-  
8 inflammatory myeloid cell activator IL-27 increased with gestation in both groups,  
9 albeit more prominently in the lean group (Supp Figure 1H, Supp Figure 1G).  
10 Levels of the myeloid pro-inflammatory factor IL-1 $\beta$  only increased in the lean  
11 group with pregnancy (Figure 1F). Additionally, levels of regulatory factors IL-  
12 1RA, chemokine CCL22, and growth factors PDGF and EGF were increased at  
13 T3 only in the obese group (Figure 1H). Finally, a significant drop in regulatory  
14 factor VEGF with pregnancy was observed in lean group alone (Supp Figure 1I).

15 We next correlated pregnancy-associated changes in circulating factors  
16 with maternal BMI (Supp Figure 1J). Our analyses revealed positive association  
17 between maternal BMI and changes in inflammatory factors leptin and IL-18 as  
18 well as regulatory factors IL-10 and PDGF (Supp Figure 1J). Surprisingly, though  
19 CRP levels remained elevated with obesity at both T1 and T3 (Figure 1B), the  
20 decrease negatively correlated with maternal BMI (Supp Figure 1J).

21

22 **Pregravid obesity alters the frequencies of monocyte subsets and disrupts**  
23 **pregnancy-associated activation trajectory of circulating monocytes.**

1           Since some of the most interesting differences between the lean and  
2 obese groups with obesity were myeloid factors (CCL4, IL-1 $\beta$ , IL-1RA, IL-27), we  
3 next investigated if pregravid obesity altered frequency of circulating innate  
4 immune cell subsets. Complete blood cell (CBC) counts revealed increased  
5 numbers of white blood cells (WBC) with pregnancy and with pregravid obesity  
6 (Supp Figure 2A). Differences in WBC numbers with obesity were primarily  
7 driven by granulocytes, with no major differences in lymphocyte or monocyte  
8 numbers (Supp Figure 2A).

9           Multi-parameter flow cytometry analysis of innate immune cells in PBMC  
10 (Supp Figure 2B) revealed no changes in major cell populations (Supp Figures  
11 2C-2E) with pregnancy or pregravid obesity with the exception of a decrease in  
12 dendritic cells (DC) frequency in the lean group (Supp Figure 2D). In mothers  
13 with obesity, pregnancy was associated redistribution of DC subsets, with higher  
14 mDC (Supp Figure 2F) but lower pDC subsets at T3 (Supp Figure 2G). Pregravid  
15 obesity was also associated with a reduced proportion of nonclassical (CD16+)  
16 subset of monocytes (Figure 2A). Although the frequency of NK cells was  
17 unchanged with pregnancy or pregravid obesity (Supp Figure 2E), the relative  
18 abundance of CD56<sup>bright</sup>CD16<sup>+</sup> NK cells increased with pregnancy in both groups  
19 (Supp Figure 2H). Very few changes in the frequency of lymphocytes were  
20 observed with pregnancy and/or obesity (Supp Figure 3). Pregravid obesity was  
21 associated with a slight decrease in the frequency of B cells (Supp Figure 3A),  
22 that was largely mediated by a drop in the frequency of memory and marginal-  
23 zone (MZ) like B cells (Supp Figure 3B). Pregnancy in the lean group was also

1 accompanied by a decrease in naïve and MZ like B cells (Supp Figure 3B) as  
2 well as transitional effector memory CD4+ T cells (Supp Figure 3E).

3 We next investigated the impact of pregnancy and pregravid obesity on  
4 the ability of innate immune cells and T cells to respond to *ex vivo* stimulation  
5 with lipopolysaccharide (LPS) and anti-CD3/CD28 respectively (Figure 1A) using  
6 intracellular staining (Supp Figure 4A). Pregnancy in lean women was associated  
7 with increased frequency of IL6<sup>+</sup>TNF<sup>+</sup> producing monocytes (Figure 2B), but not  
8 dendritic cells (Figure 2C), in response to LPS stimulation. This enhanced  
9 monocyte response was absent in the obese group resulting in fewer responding  
10 monocytes compared to the lean group at T3 (Figure 2C). Indeed, frequency of  
11 responding monocytes at T3 negatively correlated with maternal pregravid BMI  
12 (Figure 2D). Enhanced response to LPS at T3 by monocytes from the lean group  
13 was accompanied by a higher induction of activation markers CD40 and CD86  
14 (Figure 2E) as well as increased levels of circulating soluble CD14 (sCD14), a  
15 surrogate for *in vivo* monocyte activation (Figure 2G). Activation markers CD80  
16 and CD83 were upregulated to similar levels in both groups (Figure 2F). Cytokine  
17 production by T cells remained largely unchanged with pregnancy and pregravid  
18 obesity (Supp Figures 4) with the exception of enhanced Th2 responses (Supp  
19 Figure 4B).

20

21 **Single cell RNA-seq reveals significant shifts in monocyte phenotypes at**

22 **T3**

1 To better understand the impact of pregravid obesity on monocyte  
2 activation with pregnancy, we first carried out bulk RNA Seq analysis on purified  
3 monocytes obtained from T1 and T3 from lean and obese subjects (n=3/time  
4 point). Pairwise longitudinal comparison of the transcriptome of resting  
5 monocytes from the lean group showed modest changes, with increased  
6 expression of MHC molecules (*B2M*, *HLA-DRA*) and proinflammatory genes (e.g.  
7 *VCAN*, *LYZ*) (P-value <0.001) at T3 relative to T1 (Supp Figure 5A). On the other  
8 hand, monocytes from mothers with obesity (n=3/time point) exhibited modest  
9 suppression of genes involved in of interferon signaling (*STAT1*, *GBP5*, *PSMB8*)  
10 and response to reactive oxygen species (*STRBP*, *HEBP2*, *TRAP1*, *TRPA1*) (P-  
11 value <0.001) with gestational age (Supp Figure 5B).

12 Given the modest shifts detected using bulk RNA Seq and the significant  
13 functional differences observed at T3, we performed single cell RNA-sequencing  
14 of total PBMC (n=2/group) obtained at delivery (T3). After concatenating all 4  
15 libraries, we computationally extracted the monocyte clusters (~600 cells/group –  
16 total 2400 cells) using expression of *CD14* (clusters 7, 11, and 16 in the initial  
17 UMAP of PBMC; Supp Figure 5C). Following subsequent iterations of doublet  
18 removal and UMAP clustering, we identified 6 major clusters of monocytes  
19 (Figure 3A) representing the three subsets traditionally identified by flow  
20 cytometry based on expression of *CD14*, *FCGRA* (CD16), and *HLA-DRA* (Supp  
21 Figure 5D): classical monocytes (CM – clusters I, III, V); nonclassical monocytes  
22 (NCM - clusters II and IV); and intermediate (IM- cluster VI) (Figure 3B).  
23 Trajectory analysis using Monocle confirmed this classification placing non-

1 classical monocytes at the end of the pseudotime with intermediate monocytes  
2 transitioning from classical to non-classical subsets (Figure 3C and Supp Figure  
3 5E). Pregravid obesity was associated with a dramatic drop in the number of non-  
4 classical monocytes (especially cluster IV) (Figures 3D and 3E). We also  
5 detected a significant increase in classical monocytes mediated by a substantial  
6 increase in cluster III but a decrease in cluster V (Figures 3D and 3E). Classical  
7 monocytes within cluster III expressed markers of insulin resistance (*CD44*,  
8 *LMNA*, *THBD*) (Figure 3B), while those within cluster V (Figures 3B, 3D and 3E)  
9 expressed pro-inflammatory genes (*VCAN*, *S100A9*, *LYZ*) (Figure 3B).

10 Differential gene expression analysis within both classical and non-  
11 classical clusters revealed transcriptional changes associated with immune  
12 activation, signaling, differentiation, and apoptosis in with obesity (Figure 3F).  
13 Specifically, we detected suppression of *HLA-DRA*, *STAT1*, *TNFSF10*, and  
14 *FCGR3A* (Figure 3G) with pregravid obesity. Reduced surface expression HLA-  
15 DR and CD16 (encoded by *FCGR3A*) with pregravid obesity was confirmed using  
16 flow cytometry (Figure 3H). As observed with bulk RNA sequencing (Supp Figure  
17 5B), we observed a global suppression of interferon signaling pathways with  
18 pregravid obesity across all clusters (Supp Figure 5F) as exemplified by reduced  
19 expression of interferon-stimulated genes (*IFIT3*, *ISG15*, *OAS1*) (Supp Figure  
20 5G). On the other hand, pregravid obesity was associated with up-regulation of  
21 immuno-regulatory molecules such as *AHR*, *CD52*, and *CD163* (Figure 3I).

22

1 **Defects in monocyte responses with maternal obesity at T3 are cell**  
2 **intrinsic.**

3 We next investigated whether reduction in cytokine production by  
4 circulating monocytes in response to LPS with pregravid obesity is cell intrinsic.  
5 Monocytes were isolated from PBMC (Supp Figure 6A) obtained from lean  
6 subjects and those with obesity at T1 and T3 and stimulated with LPS for 8 hours  
7 (Figure 4A). Significant differences in the monocyte response to LPS with  
8 pregravid obesity were detected at both T1 (Supp Figure 6B) and T3 (Supp  
9 Figure 6C). Although gene expression responses to LPS were more robust at the  
10 T3 time point compared to T1 for both the lean (Figure 4B) and obese groups  
11 (Figure 4C), DEG detected at T3 in the obese group were predominantly down  
12 regulated (Figure 4C). Moreover, functional enrichment revealed a higher  
13 proportion of DEG detected at T3 in the lean group enriched to GO terms  
14 associated with myeloid activation, leukocyte adhesion, cytokine signaling  
15 (Figure 4D). In line with these observations, we detected lower induction of key  
16 inflammatory molecules *IL6*, *IL1B*, *TNF*, and *CCL3* (Figure 4E) in the obese  
17 group. Furthermore, at T3, we observed reduced expression of key transcription  
18 factors *NFKB1*, *FOSB*, *NCOR*, *CIITA* (Figure 4F) with pregravid obesity. These  
19 findings were supported by transcription factor analysis using ChEA3, which  
20 revealed reduced number of RELA, IRF, and STAT- regulated DEG with  
21 pregravid obesity, particularly at T3 (Figure 4G). On the other hand, the number  
22 of LPS-responsive genes regulated by TF IRF1, STAT1, and STAT3 were  
23 increased in the lean group at T3 compared to T1 (Figure 4G). Finally, we report

1 poor induction of key regulators of chromatin reorganization (*KDM2B*, *SIRT1*,  
2 *SIRT2*, *EP300*, *KDM4C*) following LPS stimulation in obese group at T3 (Figure  
3 4D and 4H), suggestive of epigenetic constraints to immune activation.

4

5 **Pregravid obesity disrupts pregnancy-associated epigenetic trajectory of**  
6 **circulating monocytes.**

7 We next asked if there exists a pregnancy-associated epigenetic clock that  
8 explains the enhanced monocyte responses to LPS at T3 relative to T1 in lean  
9 subjects. We therefore profiled open chromatin of purified resting monocytes  
10 isolated from lean and obese group at both time points using ATAC-Seq (Figure  
11 1A). Principal component analysis revealed significant shift in ATAC profiles of  
12 monocytes from T1 to T3 in lean subjects (Figure 5A), with 7132 regions open at  
13 T3 relative to T1 (Figure 5B), most of which overlapping promoter regions (Figure  
14 5C). Promoter regions open in leans at T3 relative to T1 regulated genes  
15 involved in leukocyte activation, myeloid differentiation, and regulation of  
16 oxidative stress (Supp Figure 7A). Furthermore, open intergenic regions in leans  
17 at T3 relative to T1 regulated genes involved in mounting inflammatory response  
18 to lipids and LPS (Supp Figure 7B).

19 In contrast, limited changes in chromatin accessibility were noted between  
20 T1 and T3 in the obese group (Figures 5A and 5B). Direct comparisons of lean  
21 and obese groups at each time point revealed more dramatic differences in  
22 chromatin accessibility at T3 (Figure 5D) than at T1 (Supp Figure 7C).  
23 Specifically, at T3, 40% of loci open in lean group relative to the obese group



1 overlapped promoter regions of genes involved in cytokine production, Fc  
2 receptor mediated signaling, and wound healing (Figure 5E). This is further  
3 illustrated by pileups of the loci of inflammatory genes *HLA-DRA* (Figure 5F),  
4 *TNF* (Figure 5G), *IL6ST* (Supp Figure 7D), and activation marker *CD80* (Supp  
5 Figure 7E). Finally, motif analysis revealed that promoter regions open in  
6 monocytes from lean subjects at T3 (closed in monocytes from subjects with  
7 obesity) harbor binding sites for transcription factors PU.1 and AP-1 and  
8 interferon regulators IRF1, IRF3, and IRF8. The limited number of promoter-  
9 associated regions that were open in obese group relative to leans at T3 (Figure  
10 5D) regulated genes primarily involved in histone methylation, and metabolic  
11 processes (Supp Figures 7F and 7G).

12 GREAT enrichment of intergenic loci closed in obese group at T3 relative  
13 to leans (Figure 5H) revealed several associations with immune effector process,  
14 phagocytosis, cytokine responses, and immune activation (Figure 5I). While the  
15 large number of intergenic regions open in obese group relative to leans at T3  
16 (Figure 5D) failed to enrich to any particular GO process by GREAT, motif  
17 analysis suggests enhanced binding sites for factors that regulate regulatory M2-  
18 like macrophages (STAT6 and LXR) (Figure 5J).

19

## 20 **Pregravid obesity is associated with metabolic and functional rewiring of** 21 **circulating monocytes at term**

22 The initiation of proinflammatory effector mechanisms requires a shift of  
23 cellular metabolism towards aerobic glycolysis. Therefore, we asked if the

1 reduced response to LPS is associated with a lack of metabolic plasticity.  
2 Baseline extracellular acidification rate (ECAR) measurements suggested  
3 reduced cellular preference for glycolysis with pregravid obesity (n=3/group)  
4 (Figure 6A). We also observed attenuated induction of ECAR following LPS  
5 stimulation and glucose injection (Figure 6B). Furthermore, monocytes from  
6 subjects with obesity accumulated higher levels of neutral lipids (Figure 6C).

7         Additionally, we detected changes in effector functions in monocytes with  
8 pregravid obesity. Fewer cells from the obese group phagocytosed E.coli (Figure  
9 6D, left), albeit the number of pathogen particles/cell was significantly higher  
10 (Figure 6D, right). Furthermore, pregravid obesity resulted in higher levels of  
11 cytosolic ROS following LPS stimulation (Figure 6F and Supp Figure 8A).

12

### 13 **Maternal obesity alters the differentiation trajectory of circulating** 14 **monocytes at T3.**

15         Monocytes under state of immune tolerance (reduced responsiveness to  
16 LPS challenge) or recovering from tolerance (O'Carroll et al., 2014) demonstrate  
17 defects in differentiation and polarization trajectory. Therefore, we next  
18 investigated the impact of pregravid obesity on macrophage polarization potential  
19 using *in vitro* differentiation of monocytes collected at T3 using IFN $\gamma$  (M1 like) and  
20 IL-4 (M2 like) conditioning (Figure 7F). Monocytes from mothers with obesity  
21 showed dampened induction of surface CD64 (Figure 7G, left) and CD86 (Figure  
22 7G, right) following IFN $\gamma$  stimulation with no differences in HLA-DR induction  
23 (Supp Figure 8B). In line with attenuated M1 skewing, secretion of pro-

1 inflammatory cytokines TNF $\alpha$  and IL-12p70 (Figure 7H) and chemokines CXCL9  
2 (Supp Figure 8C) and CXCL11 (Supp Figure 8D) was reduced following IFN $\gamma$   
3 stimulation. Although we observed no differences in the expression of M2-like  
4 macrophage surface markers CD163 (Supp Figure 8E) and CD209 (Supp Figure  
5 8F) following IL-4 conditioning, we observed lower production of M2-like  
6 macrophage immune molecules IL-10 (Figure 7E), CCL11 (Supp Figure 8G) and  
7 PDGF-BB (Supp Figure 8H).

8

## 9 **DISCUSSION**

10 Maternal obesity poses significant risks to maternal health, including  
11 increased susceptibility to infections during pregnancy (Robinson et al., 2005;  
12 Sebire et al., 2001; Stapleton et al., 2005), labor (Acosta et al., 2012; McLean et  
13 al., 2012; Salim et al., 2012) and post-partum (Acosta et al., 2012; McLean et al.,  
14 2012; Salim et al., 2012), suggesting disruptions in the pregnancy “immune  
15 clock”. This phenomenon refers to precisely timed adaptations in the maternal  
16 immune system, notably increased neutrophil numbers, enhanced innate immune  
17 responses, augmented STAT signaling in CD4+ T cells and NK cells, and  
18 significant changes in the circulating proteome (Aghaeepour et al., 2017;  
19 Aghaeepour et al., 2018; Le Gars et al., 2016). Previous studies profiling the  
20 impact of pregravid obesity on maternal peripheral immune have focused on one  
21 particular type of measurement at one stage of pregnancy (Acosta et al., 2012;  
22 McLean et al., 2012; Sureshchandra et al., 2018). Therefore, in this study, we  
23 used a systems approach to characterize the impact of pregravid obesity on

1 pregnancy associated “immunological clock”, using a combination of proteomic,  
2 functional, and genomic assays.

3 Profiling longitudinal differences in plasma inflammatory factors between the  
4 first (T1) and third (T3) trimesters in lean subjects and those with pregravid  
5 obesity (BMI > 30) showed that Independent of maternal BMI, the transition from  
6 T1 to T3 was associated with increased levels of several pro-inflammatory (TNF $\alpha$ ,  
7 S100B, IL-2, IFN $\beta$ , IL-17A, IL-18, IL-23) and regulatory (IL-4, IL-10, and IL-13)  
8 factors. These observations are consistent with previous reports of systemic  
9 immune activation and counter-regulation over the course of pregnancy  
10 (Aghaeepour et al., 2017). In addition to these analytes, and as previously  
11 reported (Basu et al., 2011a; Catalano et al., 2009; Challier et al., 2008; Friis et  
12 al., 2013; Roberts et al., 2011; Sen et al., 2014; Stewart et al., 2007), pregravid  
13 obesity resulted in significantly higher levels of IL-6 and CRP both at T1 and T3,  
14 highlighting a state of chronic low-grade inflammation. Higher levels of IL-6 and  
15 CRP have been linked to obstetric complications (Christian and Porter, 2014;  
16 Stewart et al., 2007).

17 Plasma levels of insulin, leptin, and adiponectin also increased with  
18 gestational age in lean subjects, likely a consequence of metabolic adaptations to  
19 the nutritional demands of a growing fetus. In contrast, in subjects with obesity,  
20 systemic levels of insulin, leptin, and resistin did not increase with gestational age.  
21 Aberrant levels of insulin and leptin have been associated with both miscarriage  
22 (Baban et al., 2010) and preeclampsia (Laivuori et al., 2000), both of which are  
23 increased with pregravid obesity.

1 Profiling circulating immune cell subsets at T1 and T3 revealed modest  
2 cellular adaptations. Pregnancy was associated with increased total WBC counts,  
3 as previously reported (Chandra et al., 2012). However, at both T1 and T3,  
4 mothers with obesity had higher WBC counts, relative to lean mothers. This  
5 significant increase was contributed by higher granulocyte counts, as previously  
6 described for non-gravid obese individuals (Rosales, 2018). No differences in T  
7 or B cell frequencies were observed with obesity. The most significant change  
8 with pregnancy was an increase in CD56<sup>++</sup>CD16<sup>+</sup> subset of NK cells. This subset  
9 of regulatory NK cells has been shown to increase with gestational age, and is  
10 the dominant NK cell subset (>95%) in the placental decidua (Le Bouteiller,  
11 2013). As reported in previous studies (Aghaeepour et al., 2017), no significant  
12 differences were seen in other innate immune cell subsets.

13 Interestingly, levels of plasma regulatory factors (IL1RA, PDGF, CCL22)  
14 were significantly elevated whereas those of IL-27, which activates monocytes  
15 via STAT1 signaling pathway, were lower in plasma of mothers with obesity at T3.  
16 Moreover, circulating levels of pro-inflammatory IL-1 $\beta$  increased with gestation in  
17 lean mothers but remained unchanged in mothers with obesity. Additionally,  
18 levels of CCL2 and CRP decreased with gestational age in mothers with obesity.  
19 Collectively, these observations strongly suggest that pregravid obesity disrupts  
20 changes in immune factors associated with myeloid cell activation, potentially to  
21 protect the developing fetus from obesity-induced chronic low-grade inflammation.

22 Indeed, pregravid obesity was associated with a lower frequency of  
23 nonclassical (CD16<sup>+</sup>) monocytes and lower expression of HLA-DR on monocytes

1 at T3. Comparison of monocyte transcriptomes at T3 from lean mothers and  
2 those with obesity using high resolution single cell RNA sequencing (scRNA-Seq)  
3 confirmed a significant reduction in the number of non-classical monocytes, and  
4 expression of both *CD16* and *HLA-DR*. Additionally, scRNA-Seq analysis showed  
5 increased expression of genes encoding inflammatory molecules *LYZ*, *VCAN*  
6 and *HLA-DR* in monocytes from lean subjects, while expression of antiviral genes  
7 was suppressed in monocytes from obese subjects. Additionally, gene encoding  
8 regulatory molecules such as *CD163*, *AHR*, and *CD52* was increased with  
9 pregravid obesity.

10 These transcriptional changes were mirrored by functional differences in  
11 monocytes obtained from lean subjects and those with obesity at T3. Specifically,  
12 while activation circulating monocytes in lean subjects increased between T1 and  
13 T3 as indicated by increased frequency of IL-6/TNF $\alpha$  producing cells following  
14 LPS stimulation and elevated levels of plasma sCD14. Moreover, bulk RNA-Seq  
15 revealed an enhanced transcriptional response to LPS at T3 relative to T1 in the  
16 lean subjects relative to those with obesity marked by higher expression of pro-  
17 inflammatory molecules (*IL6*, *IL1B*, *TNF*) and induction of transcription factors  
18 (RELA, IRF1, STAT3). These observations are in line with earlier studies that  
19 have demonstrated that monocyte responses to influenza are enhanced with  
20 gestational age (Le Gars et al., 2016). Previous studies have reported increased  
21 endogenous STAT5ab signaling in T cells with pregnancy that support the  
22 development of regulatory T cells (Aghaeepour et al., 2017). Thus, enhancement  
23 of innate immune responses over the course of pregnancy might be a

1 mechanism to counter dampened T cell responses and maintain anti-microbial  
2 immunity in the pregnant woman.

3       Pregravid obesity disrupted pregnancy-associated monocyte activation,  
4 with a significantly reduced number of TNF $\alpha$ /IL-6 producing monocytes relative to  
5 lean subjects in response to LPS at T3. Similarly, RNA Seq analysis revealed  
6 dampened induction of cytokine and chemokine genes as well as failure to  
7 upregulate expression of key transcription factors NFKB1 and FOSB following  
8 LPS stimulation. The dampened monocyte response is further evident from  
9 reduced surface expression of activation markers CD40 and CD86. Collectively,  
10 these differences in the innate immune system provide a potential explanation for  
11 the increased incidence of viral infections in obese pregnant women. It is  
12 possible that the state of chronic low-grade inflammation associated with obesity  
13 in combination with pregnancy-induced increase in circulating immune mediators  
14 result in a state of immune tolerance in circulating monocytes.

15       Several factors have been proposed to be responsible for monocyte  
16 activation with pregnancy including elevated levels of leptin and other cytokines  
17 (Sacks et al., 2001), exposure to placental microparticles released into circulation  
18 by syncytial trophoblasts (Redman et al., 2012), fetal DNA (Bianchi et al., 1996),  
19 or circulation of peripheral monocytes through the placenta (Mellembakken et al.,  
20 2002). Our RNA seq analysis also indicated changes in the expression of various  
21 epigenetic modifying factors. Supporting this state of enhanced activation with  
22 pregnancy, we report a significant increase in chromatin accessibility within  
23 promoter and intergenic loci that regulate inflammatory responses between T1

1 and T3 in resting monocytes from lean subjects. Epigenetic changes with healthy  
2 pregnancy have been shown in human uterine NK cells (Gamlie et al., 2018) and  
3 mouse mammary glands (Dos Santos et al., 2015). Our study is the first to  
4 highlight chromatin remodeling in circulating immune cells, providing the first  
5 clues of an epigenetic clock of human pregnancy. While the precise mechanisms  
6 regulating this epigenetic clock are not clear, studies have demonstrated that  
7 both type I interferons and TNF can cooperatively reprogram the epigenome of  
8 myeloid cells resulting in increased chromatin accessibility at inflammatory loci  
9 (Park et al., 2017) and establishment of transcriptional memory at the chromatin  
10 level. Indeed, our analysis of circulating immune mediators shows dramatic  
11 increase in plasma levels of both TNF and type-I interferons with pregnancy.

12 Pregravid obesity altered this epigenetic clock, resulting in a failure in the  
13 induction of transcripts associated with chromatin remodeling following LPS  
14 stimulation at T3, suggesting potential epigenetic constraints. Indeed, minimal  
15 chromatin changes were noted in monocytes from subjects with obesity between  
16 T1 and T3. A direct comparison of profiles at T1 and T3 shows a lack of  
17 remodeling within of promoter and enhancer regions that regulate cytokine-  
18 signaling (*TNF*), myeloid cell activation (*CD80*), and immune effector process  
19 (*HLA-DRA*) in monocytes from subjects with obesity. Moreover, regions that were  
20 accessible in monocytes from lean subjects (but remained closed in obese  
21 subjects) contained putative binding sites for transcription factors that orchestrate  
22 pro-inflammatory responses (AP-1, IRF1, IRF3, and IRF8). In contrast, regions



1 that were accessible in monocytes from subjects with obesity harbored binding  
2 sites for regulatory factors such as STAT6 and SMAD2.

3       Epigenetic priming mechanisms play critical roles in tolerance and training  
4 of innate immune memory, and our findings support the hypothesis that pregravid  
5 obesity results in tolerance in circulating monocytes. Specifically, expression of  
6 *HLA-DR* in monocytes at T3 measured at the protein, transcript, and epigenetic  
7 levels were significantly reduced. Lower MHC class II molecule expression has  
8 been described in models of endotoxin tolerance and in sepsis patients during  
9 late stages of immunoparalysis (Wolk et al., 2003).

10       An immunotolerant state has been shown to affect functional plasticity in  
11 monocytes. Earlier studies have reported enhanced intracellular ROS levels  
12 (Sacks et al., 1998) but reduced phagocytic function (Lampe et al., 2015) in  
13 monocytes with pregnancy. Functional assessment of purified monocytes at T3  
14 showed that pregravid obesity results in a reduction in the number of monocytes  
15 that can phagocytose bacteria but an increased aggregate pathogen engulfment  
16 per cell. Furthermore, monocytes from pregnant subjects with obesity had an  
17 enhanced oxidative burst following LPS exposure. This is in contrast to studies  
18 describing reduced *ex vivo* *E. coli* and *S. aureus* induced ROS production in  
19 tolerant monocytes (Grondman et al., 2019). These differences in outcomes  
20 could be explained by different triggers of oxidative stress (LPS vs. pathogen).  
21 Immune tolerance can also impact the ability of monocytes to differentiate  
22 towards M1- or M2-like state under different polarization conditions. In agreement  
23 with transcriptional and cytokine responses, monocyte-derived macrophages

1 (MoDM) from mothers with obesity polarized poorly to M1 but not to M2 skewing  
2 conditions. Cytokine secretion, however, were dampened under both conditions,  
3 suggesting overall reduced plasticity compared to the lean counterparts.

4 Another manifestation of immune tolerance is the lack of metabolic  
5 plasticity. Indeed, monocytes obtained from humans injected with low dose LPS  
6 show a lack of metabolic plasticity, failing to up-regulate glycolysis, pentose  
7 phosphate pathway (PPP), and down-regulate lipid metabolic pathways when re-  
8 challenged *ex vivo* with LPS (Grondman et al., 2019). Our analysis of maternal  
9 monocytes at T3 showed reduced basal extracellular acidification rate (ECAR)  
10 with obesity indicative of dampened preference for glycolysis. Additionally, we  
11 observed poor induction of glycolysis following LPS injection. This coupled with  
12 the accumulation of higher levels of neutral lipids further supporting metabolic  
13 reprogramming with maternal obesity.

14 In summary, this study revealed that pregravid obesity disrupts the  
15 monocyte activation trajectory associated with pregnancy (Figure 7), thereby  
16 providing a potential explanation for increased susceptibility to infections during  
17 gestation and post-partum in pregnant subjects with obesity. The study also  
18 provides a conceptual framework of an epigenetic clock that supports the  
19 immune clock of pregnancy. We were able to demonstrate that pregravid obesity  
20 disrupts the pregnancy immune clock, altering the metabolic, molecular and  
21 functional phenotype of peripheral monocytes towards a regulatory phenotype.  
22 Future studies will focus on generating a comprehensive model of monocyte  
23 activation with additional gestational time points as well as assessing the impact

1 of pregravid obesity on the monocyte response to pathogens. Peripheral blood  
2 monocytes are recruited to become decidual macrophages; hence future  
3 experiments will also interrogate the impact of pregravid obesity at the maternal  
4 fetal interface.

5

## 1 **MATERIALS AND METHODS**

### 2 **Subjects and experimental design**

3 This study was approved by the Institutional Ethics Review Board of Oregon  
4 Health and Science University and the University of California, Irvine. Written  
5 consent was obtained from all subjects. A total of 117 non-smoking women (69  
6 lean and 48 obese) who had an uncomplicated, singleton pregnancy were  
7 enrolled for this study. The breakdown is as follows: 1) 37 women classified as  
8 lean and 28 women classified as obese were enrolled during first trimester  
9 (~week 12, designated as T1) of whom 29 lean and 27 obese also provided a  
10 blood sample during the third trimester (~Week 37, designated as T3); 2) 32  
11 women classified as lean and 20 women classified as obese based on pre-  
12 pregnancy BMI were enrolled during the third trimester and provided one sample  
13 at ~37 weeks (T3). The mean age of the 69 lean women was  $32.8 \pm 4.7$  years and  
14 the average pre-pregnancy BMI was  $21.9 \pm 1.7$  kg/m<sup>2</sup>; mean age of the 48 obese  
15 women was  $29.4 \pm 9$  years with an average pre-pregnancy BMI of  $35.2 \pm 5.2$   
16 kg/m<sup>2</sup> (Table 1).

17 The racial distribution of the entire cohort was as follows: 101 Caucasian, 7 Asian  
18 American, 2 Pacific Islander, 6 American Indian/Alaskan native, 6 African  
19 American, and 3 declined to report. Exclusion criteria included active maternal  
20 infection, documented fetal congenital anomalies, substance abuse, chronic  
21 illness requiring regular medication use, preeclampsia, gestational diabetes,  
22 chorioamnionitis, significant medical conditions (active cancers, cardiac, renal,  
23 hepatic, or pulmonary diseases), or an abnormal glucose tolerance test. Women

1 underwent a fasting blood draw and body composition via air displacement  
2 plethysmography using a BodPod (Life Measurement Inc).

### 3 **Plasma and Peripheral Blood Mononuclear Cell (PBMC) isolation**

4 Complete blood counts were obtained by Beckman Coulter Hematology analyzer  
5 (Brea, CA). Peripheral blood mononuclear cells (PBMC) and plasma were  
6 obtained by standard density gradient centrifugation over Ficoll (GE Healthcare).  
7 PBMC were frozen in 10% DMSO/FBS and stored in liquid nitrogen until analysis.  
8 Plasma was stored at -80°C until analysis.

### 9 **Luminex assay**

10 Immune mediators in plasma were measured using a customized multiplex  
11 human factor panel (R & D Systems, Minneapolis MN) measuring cytokines  
12 (IFN $\beta$ , IFN $\gamma$ , IL-1 $\beta$ , IL-10, IL-12p70, IL-13, IL-15, IL-17A, IL-18, IL-1RA, IL-2, IL-21,  
13 IL-4, IL-5, IL-7, TNF $\alpha$ , IL-23, IL-31, IL-22, IL-27), chemokines (CCL2/MCP-1,  
14 CCL3/MIP-1 $\alpha$ , CCL4/MIP-1 $\beta$ , CCL5/RANTES, CCL11/Eotaxin, CXCL1/GRO $\alpha$ ,  
15 CXCL8/IL-8, CXCL9/MIG CXCL10/IP-10, CXCL11/I-TAC, CXCL12/SDF-1 $\alpha$ ,  
16 CXCL13/BCA-1, growth factors (BDNF, GM-CSF, HGF, EGF, VEGF, PDGF-BB)  
17 and additional molecules (PD-L1, S100). Metabolic hormones were measured  
18 using a 3-plex kit measuring insulin, leptin, and PYY (Millipore, Burlington MA).  
19 Adipokines were assayed using a 5-plex kit measuring adiponectin, adipisin,  
20 lipocalin-2, total PAI-1, and resistin (Millipore, Burlington MA). Samples were  
21 diluted per manufacturer's instructions and run in duplicates on the Magpix  
22 Instrument (Luminex, Austin, TX). Data were fit using a 5P-logistic regression on  
23 xPONENT software.

1 **ELISA**

2 CRP and IL-6 were measured using a high sensitivity ELISA (Life Technologies,  
3 Carlsbad CA). Plasma soluble CD14 (sCD14) was measured using ELISA per  
4 manufacturer's instruction (Hycult Biotech, Uden, Netherlands)

5 **PBMC and monocyte phenotyping.**

6  $10^6$  PBMC were stained using the following cocktail of antibodies to enumerate  
7 innate immune cells and their subsets: PE-CD3, PE-CD19, PB-CD16, PE-Cy7-  
8 CD11c, AF700-CD14, PCP-Cy5.5-CD123, BV711-CD56, and APC-Cy7-HLA-DR.  
9 An additional  $10^6$  PBMC from a subset of samples were stained using an  
10 additional panel to further characterize monocyte phenotype : AF700-CD14,  
11 APC-Cy7-HLA-DR, PB-CCR5, AF488-TLR2, BV711-TLR4, PCP-Cy5.5-CD163,  
12 BV605-CCR2, PE-eF610-CD11c, PE-Cy7-CD11b, and PE-CX3CR1. After  
13 surface staining, cell pellets were washed twice in PBS and resuspended in cold  
14 FACS buffer (PBS with 2% FBS and 1mM EDTA). All samples were acquired  
15 with the Attune NxT Flow Cytometer (ThermoFisher Scientific, Waltham MA) and  
16 analyzed using FlowJo 10.5.0 (Ashland OR).

17 **Intracellular cytokine assay and monocyte activation**

18 To measure cytokine responses of monocytes and dendritic cells,  $10^6$  PBMC  
19 were stimulated for 16h at 37°C in RPMI supplemented with 10% FBS in the  
20 presence or absence of 1 ug/mL LPS (TLR4 ligand, *E.coli* 055:B5; Invivogen,  
21 San Diego CA); Brefeldin A (Sigma, St. Louis MO) was added after 1 hour  
22 incubation. Cells were stained for APC-Cy7-CD14 and PCP-Cy5.5-HLA-DR, fixed,  
23 permeabilized, and stained intracellularly for APC-TNF  $\alpha$  and PE-IL-6. To

1 measure immune activation, a subset of PBMC samples were stimulated with  
2 LPS for 16h without Brefeldin A, washed twice with PBS and surface stained  
3 using a cocktail of following antibodies for 20 minutes: FITC-CD62L, AF700-  
4 CD14, HLA-DR-APC-Cy7, PB-CD16, BV510-CD40, PE-Cy7-CD80, PCP-Cy5.5-  
5 CD83, BV605-CD86, BV711-CD64, PE-CXCR6, and PE-Dazzle594-PD-L1. Cell  
6 pellets were washed twice in PBS and resuspended in cold FACS buffer (PBS  
7 with 2% FBS and 1mM EDTA). All samples were acquired with the Attune NxT  
8 Flow Cytometer (ThermoFisher Scientific, Waltham MA) and analyzed using  
9 FlowJo 10.5 (Ashland OR).

#### 10 **Isolation of monocytes**

11 Monocytes were purified from freshly thawed PBMC using CD14 antibodies  
12 conjugated to magnetic microbeads per the manufacturer's recommendations  
13 (Miltenyi Biotec, San Diego CA). Magnetically bound monocytes were washed  
14 and eluted for collection. Purity was assessed using flow cytometry and was on  
15 average  $\geq 95\%$  (Supp Figure 7A).

#### 16 **Monocyte stimulation**

17  $10^5$  purified monocytes were cultured in RPMI supplemented with 10% FBS with  
18 or without 1 ug/mL LPS (TLR4 ligand, *E.coli* 055:B5; Invivogen, San Diego CA) in  
19 96-well tissue culture plates at 37C in a 5% CO<sub>2</sub> environment for 8 hours. Plates  
20 were spun down and cell pellets were resuspended in Qiazol (Qiagen) for RNA  
21 extraction. Both cells and supernatants were stored in -80C until they could be  
22 processed as a batch.

#### 23 **Library generation for bulk RNA-Seq**

1 Total RNA was isolated from monocytes using mRNeasy kit (Qiagen, Valencia  
2 CA). Quality and concentrations were measured using Agilent 2100 Bioanalyzer.  
3 Libraries were generated using TruSeq Stranded Total RNA-Seq kit (Illumina,  
4 San Diego CA). Briefly, following rRNA depletion, mRNA was fragmented for 8  
5 min, converted to double stranded cDNA and adapter ligated. Fragments were  
6 then enriched by PCR amplification and purified. Size and quality of the library  
7 was verified using Qubit and Bioanalyzer. Libraries were multiplexed and  
8 sequenced on the HiSeq4000 platform (Illumina, San Diego CA) to yield an  
9 average of 20 million 100 bp single end reads per sample.

#### 10 **Bulk RNA-Seq analysis**

11 Quality control of raw reads was performed retaining bases with quality scores of  
12  $\geq 20$  and reads  $\geq 35$  base pair long. Reads were aligned to human genome (hg38)  
13 using splice aware aligner TopHat using annotations available from ENSEMBL  
14 (GRCh38.85) database. Quantification of read counts was performed using  
15 GenomicRanges package in R and normalized to derive transcripts per million  
16 (TPM) counts. To detect the effect of pregravid obesity in resting monocytes at  
17 T1 and T3 respectively, differential expression analysis was performed using  
18 quasi-likelihood linear modeling in edgeR. To test pairwise longitudinal changes  
19 with lean and obese groups, data was fit into negative binomial GLMs with a  
20 design matrix that preserved sample ID information. Lowly expressed genes  
21 were filtered at the count stage, eliminating ones with 0 counts in at least 3  
22 samples regardless of the group. Due to the relatively low number of genes



1 passing the standard FDR cutoff (FDR <0.05), genes with expression difference  
2 (relaxed statistical p-value <0.01) were included in subsequent analyses.

3 Responses to LPS were modeled pairwise at each time point using negative  
4 binomial GLMs following low read count filtering. Genes with expression  
5 difference (FDR <0.05) were considered differentially expressed genes (DEG).

6 Functional enrichment of DEG was performed using Metascape and InnateDB.

7 Transcription factors that regulate expression of DEG were predicted using

8 ChEA3 tool using ENSEMBL CHIP database. Heatmaps of fold change or TPMs

9 were generated and bubble plots for enrichment of Transcription Factor (TF)

10 regulation or Gene Ontology (GO) terms was generated using ggplot in R. Gene

11 expression data have been deposited in NCBI's Sequence Read Archive (SRA

12 accession number pending).

### 13 **Cell Sorting and library generation for single cell (sc)RNA-seq**

14 PBMC from delivery time point were thawed and live cells were sorted into RPMI

15 (supplemented with 30% FBS) using the BD FACS Aria Fusion and SYTOX Blue

16 (1:1000, ThermoFisher). Sorted cells were counted in triplicates and

17 resuspended in PBS with 0.04% BSA in a final concentration of 1200 cells/uL.

18 Cells were immediately loaded in the 10X Genomics Chromium with a loading

19 target of 17,600 cells. Libraries were generated using the V3 chemistry per the

20 manufacturer's instructions (10X Genomics, Pleasanton CA). Libraries were

21 sequenced on Illumina NovaSeq with a sequencing target of 50,000 reads per

22 cell.

### 23 **scRNA-seq data analysis**

1 Raw reads were aligned and quantified using the Cell Ranger Single-Cell  
2 Software Suite (version 3.0.1, 10X Genomics) against the GRCh38 human  
3 reference genome using the STAR aligner. Downstream processing of aligned  
4 reads was performed using Seurat (version 3.1.1). Droplets with ambient RNA  
5 (cells fewer than 400 detected genes), potential doublets (cells with more than  
6 4000 detected genes, and dying cells (cells with more than 20% total  
7 mitochondrial gene expression) were excluded during initial QC. Data objects  
8 from lean and obese group were integrated using Seurat. Data normalization and  
9 variance stabilization was performed using *SCTransform* function using a  
10 regularized negative binomial regression, correcting for differential effects of  
11 mitochondrial and ribosomal gene expression levels and cell cycle. Dimension  
12 reduction was performed using *RunPCA* function to obtain the first 30 principal  
13 components followed by clustering using the *FindClusters* function in Seurat.  
14 Visualization of clusters was performed using UMAP algorithm as implemented  
15 by Seurat's *runUMAP* function. Cell types were assigned to individual cluster  
16 using *FindMarkers* function with a fold change cutoff of at least 0.5 and using a  
17 known catalog of well-characterized scRNA markers for PBMC (Zheng et al.,  
18 2017).

19 Three monocyte clusters expressing high levels of *CD14* were extracted from  
20 dimension reduced Seurat object using the *subset* function. Cells were re-  
21 clustered and visualized using UMAP. Doublet clusters were identified by  
22 iterative clustering removing clusters with high expression of genes associated  
23 with T cells, B cells, and NK cells. Differential expression analysis was tested

1 using Wilcoxon rank sum test followed by bonferroni correction using all genes in  
2 the dataset. For gene scoring analysis, we compared gene signatures and  
3 pathways from KEGG (<https://www.genome.jp/kegg/pathway.html>) in  
4 subpopulations using Seurat's *AddModuleScore* function. Two-way functional  
5 enrichment of differential signatures was performed on Metascape. Differential  
6 hierarchies within the monocyte compartment were reconstructed using Monocle  
7 (version 2.8.0). Briefly, clustering was performed using t-SNE and differential  
8 genes identified using Monocle's *differentialGeneTest*. These genes (q-value <  
9 1e-10) were used for ordering cells on a pseudotime.

#### 10 **Neutral Lipid Staining**

11 Neutral lipids in monocytes were quantified in monocytes using flow cytometry.  
12 Briefly, 500,000 PBMC were surface stained (CD14-AF700, HLA-DR-APC-Cy7)  
13 for 20 minutes at 4C, washed twice, and resuspended in 500 uL warm 1X PBS  
14 containing 1 ug/mL BODIPY™ 493/503 (ThermoFisher Scientific). Cells were  
15 incubated at 37C for 10 minutes and samples were acquired with the Attune NxT  
16 Flow Cytometer (ThermoFisher Scientific, Waltham MA) and analyzed using  
17 FlowJo 10.5 (Ashland OR).

#### 18 **Metabolic Assays**

19 Basal Oxygen Consumption Rate (OCR) and Extracellular Acidification Rate  
20 (ECAR) were measured using Seahorse XF Glycolysis Rate Assay on Seahorse  
21 XFp Flux Analyzer (Agilent Technologies) following manufacturer's instructions.  
22 Briefly 200,000 purified monocytes were seeded on Cell-Tak (Corning) coated 8-  
23 well culture plates in phenol free RPMI media containing 2 mM L-glutamine, 10

1 mM L-glucose, 1mM sodium pyruvate, and 5mM HEPES. Seeded plates were  
2 placed in 37C incubator without CO<sub>2</sub> and run on the XFp with extended basal  
3 measurements, followed by serial injections of Rotenone/Actinomycin (final well  
4 concentration 0.5 uM) to block oxidative phosphorylation followed by 2-Deoxy-D-  
5 Glucose (2-DG, 500 mM) to block glycolysis. Cellular responses to stress under  
6 activated conditions were measured using Seahorse XF Glycolysis Stress Assay.  
7 Purified monocytes were seeded in the in glucose free media and cultured in the  
8 presence/absence of 1 ug/mL LPS for 1 hour in 37C incubator without CO<sub>2</sub>.  
9 Plates were run on the XFp for 8 cycles of basal measurements, followed by an  
10 acute injection of L-glucose (100 mM), oligomycin (50 uM), and 2-DG (500 mM).  
11 Analysis and interpretation of data was done on Seahorse Wave desktop  
12 software (Agilent Technologies).

### 13 **Phagocytosis Assay**

14 Cellular phagocytosis was measured using pH-sensitive pHrodo® E. coli  
15 BioParticles® conjugates (ThermoFisher Scientific). 500,000 PBMC were  
16 activated with 100 ng/mL LPS for 4h, washed twice and incubated for an  
17 additional 2 hours in media containing pHrodo conjugates at 1 mg/mL conjugates.  
18 Pellets were washed twice, surface stained (CD14-AF700, HLA-DR-APC-Cy7),  
19 and resuspended in ice-cold FACS buffer. All samples were acquired with the  
20 Attune NxT Flow Cytometer (ThermoFisher Scientific, Waltham MA) and  
21 analyzed using FlowJo 10.5 (Ashland OR).

### 22 **Cellular ROS assay**

1 For intracellular ROS measurements, 500,000 PBMC were stimulated with 1  
2 ug/mL LPS for 4 hours. For negative control, cells were incubated in serum-free  
3 media containing 200 uM anti-oxidant N-acetylcysteine (NAC) for 1.5 hours. Both  
4 negative and positive controls were incubated with tert-butyl hydroperoxide  
5 (TBHP) for 30 minutes to induce oxidative stress. All samples were then  
6 incubated with 2.5 uM CellROX Deep Red (Life Technology) at 37C for 30  
7 minutes, washed twice, surface stained (CD14-FITC, HLA-DR-PCP-Cy5.5) and  
8 samples were acquired with the Attune NxT Flow Cytometer (ThermoFisher  
9 Scientific, Waltham MA) and analyzed using FlowJo 10.5 (Ashland OR).

#### 10 **In vitro Macrophage Differentiation**

11 100,000 purified monocytes were cultured in 24-well tissue culture plates treated  
12 for increased attachment (VWR) in RPMI supplemented with 1% Human AB  
13 Serum (Omega Scientific) for 7 days with media supplemented on day 3. On day  
14 7, cells were polarized to M1-like macrophages using 1 ug/mL LPS and 100  
15 ng/mL IFN $\gamma$  (Peprotech) or M2-like macrophages using 100 ng/mL IL-4  
16 (Peprotech) and cultured for an additional 24 hours (day 8). Cell pellets from day  
17 7 and day 8 were surface stained (CD16-PB; CD64-BV711; HLA-DR-APC-Cy7;  
18 CD86-BV605; CD163-PCP-Cy5.5; CD209-R-PE) and analyzed using flow  
19 cytometry. Supernatants were collected and quantified for secreted cytokines and  
20 chemokines using a 29-plex luminex assay (R & D Systems).

#### 21 **Library generation for ATAC-Seq**

22 ATAC-Seq libraries were generated using a recently described modified protocol  
23 (OMNI-ATAC) to reduce mitochondrial reads. Briefly, 50,000 purified monocytes

1 were lysed in lysis buffer (10mM Tris-HCl (pH 7.4), 10 mM NaCl, 3 mM MgCl<sub>2</sub>),  
2 for 3 min on ice to prepare the nuclei. Immediately after lysis, nuclei were spun at  
3 500g for 10 min to remove the supernatant. Nuclei were then incubated with  
4 transposition mixture (100 nM Tn5 transposase, 0.1% Tween-20, 0.01% Digitonin  
5 and TD Buffer) at 37C for 30 min. Transposed DNA was then purified with  
6 AMPure XP beads (Beckman Coulter) and partially amplified for 5 cycles using  
7 the following PCR conditions - 72C for 3 min; 98C for 30s and thermocycling at  
8 98C for 10s, 63C for 30s and 72C for 1 min. To avoid overamplification, qPCR  
9 was performed on 5 uL of partially amplified library. Additional cycles of  
10 amplification for the remainder of the sample were calculated from the saturation  
11 curves (cycles corresponding to a third of the saturation value). Fully amplified  
12 samples were purified with AMPure beads and quantified on the Bioanalyzer  
13 (Agilent Technologies, Santa Clara CA).

#### 14 **Analysis of ATAC-Seq data**

15 Paired reads from sequencing were quality checked using FASTQC and trimmed  
16 to retain reads with quality scores of  $\geq 20$  and minimum read lengths of 50 bp.  
17 Trimmed paired reads were aligned to the human genome (hg38) using Bowtie2  
18 (`-X 2000 -k 1 -very-sensitive -no-discordant -no-mixed`). Reads aligning to  
19 mitochondrial genome and allosomes were removed using samtools. PCR  
20 duplicate artifacts were then removed using Picard. Finally, poor quality  
21 alignments and improperly mapped reads were filtered using samtools (samtools  
22 `view -q 10 -F 3844`). To reflect the accurate read start site due to Tn5 insertion,  
23 BAM files were repositioned using ATACseqQC package in R. The positive and

1 negative strands were offset by +4bp and -5bp respectively. Samples within a  
2 group were merged and sorted using samtools.  
3 Sample QC and statistics for merged BAM files were generated using HOMER  
4 makeTagDirectory function. Accessible chromatin peaks were called for mapped  
5 paired reads using HOMER findpeak function (-minDist 150 -region -fdr 0.05).  
6 PCA and sample clustering were performed on accessible peaks using DiffBind.  
7 Differentially accessible regions (DAR) in either direction were captured using  
8 HOMER getDifferentialPeaks function (-q 0.05). DAR were annotated using the  
9 human GTF annotation file (GRCh38.85) and ChIPSeeker with a promoter  
10 definition of -1000 bp and +100 bp around the transcriptional start site (TSS).  
11 Peaks overlapping 5'UTRs, promoters, first exons and first introns were pooled  
12 for functional enrichment of genes. For intergenic changes, the genes closest to  
13 the intergenic DAR were considered. Functional enrichment of this pooled list of  
14 genes was performed using DAVID (Fisher p-value <0.05). BAM files were  
15 converted to bigWig files using bedtools and visualized on the new WashU  
16 EpiGenome browser.

### 17 **Statistical analysis**

18 All statistical analyses were conducted in Prism 8 (GraphPad). All definitive  
19 outliers in two-way and four-way comparisons were identified using ROUT  
20 analysis (Q=0.1%). Data was then tested for normality using Shapiro-Wilk test  
21 ( $\alpha=0.05$ ). If data were normally distributed across all groups, differences with  
22 obesity and pregnancy were tested using ordinary one-way ANOVA with  
23 unmatched samples. Multiple comparisons were corrected using Holm-Sidak test

1 adjusting the family-wise significance and confidence level at 0.05. If gaussian  
2 assumption was not satisfied, differences were tested using Kruskal-Wallis test  
3 ( $\alpha=0.05$ ) followed by Dunn's multiple hypothesis correction test. Differences  
4 in normally distributed datasets were tested using an unpaired t-test with Welch's  
5 correction (assuming different standard deviations). Two group comparisons that  
6 failed normality tests were carried out using Mann-Whitney test. Associations and  
7 correlograms between BMI and cytokine levels were generated using corrplot  
8 package in R.  
9



## 1 **Acknowledgements**

2 We thank Samantha Castañeda and Andrew N. Tang for assistance with immune  
3 assays; Selene B. Nguyen for assistance with preparation of RNA-Seq libraries;  
4 and Brian Jin Kee Ligh for help with ATAC-Seq data analysis. We thank Dr.  
5 Jennifer Atwood for assistance with sorting and imaging flow cytometry in the  
6 flow cytometry core at the Institute for Immunology, UCI. We thank Dr. Melanie  
7 Oakes from UCI Genomics and High-Throughput Facility for assistance with 10X  
8 library preparation and sequencing.

## 9 **Author Contributions**

10 SS, NEM, and IM conceived and designed the experiments. SS, NM, AJ, and MZ  
11 performed the experiments. SS, IM and NM analyzed the data. SS, NEM and IM  
12 wrote the paper.

## 13 **Declaration of Interests**

14 The authors have declared that no financial or non-financial competing interests  
15 exist.

## 16 **Funding**

17 This study was supported by grants from the National Institutes of Health  
18 1K23HD06952 (NEM), R03AI112808 (IM), 1R01AI142841 (IM), and  
19 1R01AI145910 (IM).

## 20 **Data availability**

21 The datasets supporting the conclusions of this article are available on NCBI's  
22 Sequence Read Archive (SRA# pending).

23

1 **FIGURE LEGENDS**

2 **Figure 1: Experimental Design and longitudinal changes in maternal**  
3 **inflammatory environment**

4 (A) Blood samples were obtained from pregnant women during early (week 12 –  
5 T1) and late (week 37 – T3) pregnancy. PBMC and plasma were isolated and  
6 used to assess the impact of pregravid obesity on maternal immunity. (B, C) Bar  
7 graphs depicting changes in plasma levels of inflammatory mediators (B) CRP  
8 and (C) IL-6 measured using high sensitivity ELISA. (D, E) Circulating levels of  
9 metabolic hormones (D) insulin, (E) leptin were measured using luminex. Levels  
10 of significance: \* -  $p < 0.05$ , \*\* -  $p < 0.01$ , \*\*\*  $p < 0.001$ , \*\*\*\* -  $p < 0.0001$ . Bars denote  
11 median with interquartile ranges. (F) Bubble plot representing changes in  
12 immune mediator levels in plasma with gestation. Size of the bubble represents  
13 median values of analytes in pg/mL (log<sub>2</sub> transformed). The colors at T3  
14 represent the levels of significance relative to T1. (G-H) Four-way violin plots  
15 comparing plasma levels of (H) pro-inflammatory myeloid factors CCL2 and IL-1 $\beta$   
16 and (H) regulatory cytokine (IL-1RA), chemokine (CCL22), and growth factors  
17 (PDGF and EGF). Levels of significance: \* -  $p < 0.05$ , \*\* -  $p < 0.01$ ; \*\*\* -  $p < 0.001$ ;  
18 \*\*\*\*-  $p < 0.0001$ .

19 **Figure 2: Pregnancy and obesity associated changes in innate immune**  
20 **phenotype and ex vivo response.**

21 (A) Bar graph depicting percentages of non-classical subset (CD14<sup>+</sup>CD16<sup>++</sup>)  
22 within monocytes. (B-C) Violin plots showing percentage of IL6 and TNF  
23 producing (B) monocytes and (C) dendritic cells (DCs) following 16h LPS

1 stimulation. (D) Linear regression analysis of maternal BMI and monocyte  
2 responses to LPS at T3. Deviations in slope of regression line were tested using  
3 F-test. (E-F) Surface expression of activation markers (E) CD40, CD86 and (F)  
4 CD80, and CD83 on monocytes following 16h LPS stimulation at T3 time point.  
5 (G) Plasma levels of soluble CD14 measured at both time points using ELISA.  
6 Levels of significance: \* -  $p < 0.05$ , \*\* -  $p < 0.01$ . Bars denote median and  
7 interquartile ranges.

8 **Figure 3: Single cell profiles of blood monocytes at delivery.**

9 (A) UMAP of monocytes following extractions of CD14<sup>high</sup> clusters from UMAP of  
10 PBMC from lean (n=2) and obese (n=2) subjects, colored by cell state (clusters),  
11 and annotated by cluster numbers and monocyte subsets (CM- classical  
12 monocytes, IM – intermediate, NCM – nonclassical monocytes). (B) Heatmap  
13 showing expression patterns of the 10 most distinguishing markers per cell state  
14 with selected markers indicated (yellow = high expression; green = intermediate  
15 expression; blue = low expression) phenotype. (C) Trajectory analysis of  
16 monocyte with cells colored by their original cluster designation. (D) UMAP  
17 visualization of monocytes, colored by group. (E) Relative frequencies of cells  
18 within each UMAP cluster in either group. (F) Functional enrichment of genes  
19 differentially expressed with pregravid obesity in classical and non-classical  
20 monocyte subsets. Bubble size and color are indicative of number of genes  
21 within each ontology term and the significance of its enrichment. (G) Violin plots  
22 showing log-transformed, normalized expression levels for select genes down-  
23 regulated with pregravid obesity (H) Surface expression of HLA-DR and CD16

1 using flow cytometry. Error bars represent medians with interquartile range. (I)  
2 Violin plots showing log-transformed, normalized expression levels for select  
3 genes up-regulated with pregravid obesity

4 **Figure 4: Cell intrinsic defects in monocyte responses to LPS with maternal**  
5 **obesity**

6 (A) Experimental design for RNA-seq. (B-C) Venn diagrams comparing LPS  
7 induced differentially expressed genes (DEG) between T1 and T3 in purified  
8 monocytes from (B) lean and (C) obese groups following 8h LPS exposure.  
9 Numbers of Up- and down-regulated DEG (FDR≤0.05) are annotated with  
10 corresponding arrows (D) Bubble plot representing gene ontology terms enriched  
11 following LPS stimulation in all four groups following LPS stimulation. Both up-  
12 and down-regulated genes are included. Size of the bubble represents numbers  
13 of genes mapping to the term while color indicates level of significance. (E)  
14 Heatmap comparing fold changes of DEG (both up- and down-regulated) that  
15 mapped to GO terms “cytokine production” and “Myeloid leukocyte activation”.  
16 Green indicates down-regulation while orange indicates up-regulation. (F) Fold  
17 change of key nuclear factors significantly down-regulated with LPS. (G) Bubble  
18 plots representing number of DEG regulated by specific LPS inducible  
19 transcription factors predicted by ChEA3. Size of the bubble represents the  
20 numbers of DEG regulated by each transcription factor. Color of the bubble  
21 represents the level of significance for each prediction. (H) Heatmap comparing  
22 fold changes of DEG (both up- and down-regulated) that mapped to GO terms

1 “Chromatin organization”. Green indicates down-regulation while orange  
2 indicates up-regulation.

3 **Figure 5: Epigenetic adaptations with pregnancy and maternal obesity.**

4 (A) PCA of chromatin accessibility profiles in monocytes isolated at T1 and T3  
5 from lean and obese subjects. Arrows represent trajectory from T1 to T3. (B) Bar  
6 graphs with numbers of differentially accessible regions (DAR) identified in each  
7 comparison. Numbers in parenthesis denote open regions identified in a  
8 particular group relative to the comparison group. (C) Pie charts showing  
9 genomic contexts of loci identified as DAR with gestation in the lean group. (D)  
10 Genomic annotations of 4149 and 5,498 DAR identified as open in lean and  
11 obese group respectively at T3. (E) Functional enrichment of genes regulated by  
12 promoter-associated DAR open in lean group relative to obese group ( $FC > 2$ ).  
13 Genes associated with these regions are quantified next to each term (F-G)  
14 WashU Epigenome tracks for (F) *HLA-DRA* and (G) *TNF* locus with promoter  
15 vicinity highlighted in yellow. (H) Enrichment of motifs in promoter associated  
16 open DAR in lean group relative to the obese group at T3. Only motifs identified  
17 in myeloid cells are included in the table. (I) Gene ontologies of intergenic  
18 associations identified by GREAT as significantly open in lean group relative to  
19 obese group at T3. (J) Enrichment of motifs in open intergenic DAR in obese  
20 group relative to lean group at T3. Only motifs identified in myeloid cells are  
21 included in the table.

22 **Figure 6: Metabolic and functional reprogramming of monocytes with**  
23 **maternal obesity at term.**

1 (A) Mean ECAR of purified monocytes from lean (blue) and obese (red) group  
2 (n=3/group) under basal conditions using glycolytic rate assay. (B) Mean ECAR  
3 of LPS activated monocytes (acute injection) from lean (blue) and obese (red)  
4 under glucose-free conditions, and post glucose injection using glycolytic stress  
5 assay. (C) Bar graphs comparing MFIs of BODIPY within CD14+ gate in PBMC  
6 (D) Bar graphs comparing pHrodo+ CD14+ cells following incubation of PBMC  
7 with pHrodo conjugated E.coli for 4 hours (left) and pHrodo signal within the  
8 pHrodo+ monocytes (right). (E) Cytosolic ROS readouts in LPS activated  
9 monocytes using FACS analysis of CellROX treated PBMC. (F) Experimental  
10 design for monocyte differentiation and polarization assay. (G) Bar graphs  
11 comparing induction of surface CD64 and CD86 expression following LPS and  
12 IFN $\gamma$  stimulation of monocyte derived macrophages on day 7 post differentiation.  
13 (H) Secreted TNF $\alpha$  and IL-12p70 levels following LPS and IFN $\gamma$  stimulation on  
14 day 7 using luminex. (I) Secreted IL-10 levels following IL-4 stimulation on day 7  
15 post differentiation.

16 **Figure 7: Model of the trajectory of monocyte activation with gestation and**  
17 **its disruption by pregravid obesity.**

18

## 19 **SUPPLEMENT FIGURES**

20 **Supplementary Figure 1: Longitudinal changes in circulating inflammatory**  
21 **environment.**

22 (A) Linear regression of fat mass and pregravid BMI at T1 and T3. (B) Dot plots  
23 demonstrating gestational weight gain (GWG) in lean and obese subjects. (C-F)

1 Bar graphs comparing circulating levels of (C) resistin, (D) adipsin, (E)  
2 adiponectin, and (F) peptide YY (PYY) at T1 and T3. (G-I) Four-way violin plots  
3 comparing plasma levels of (G) IL-27, (H) CCL4, and (I) VEGF-A. (J) Association  
4 between changes in plasma analyte level with gestation (T3-T1) and BMI. Size of  
5 the bubble reflects the strength of Pearson's correlation, and color indicates  
6 direction of association (red-positive; blue-negative). Levels of significance: \*-  
7  $p < 0.05$ , \*\* -  $p < 0.01$ ; \*\*\* -  $p < 0.001$ ; \*\*\*\*-  $p < 0.0001$ .

### 8 **Supplementary Figure 2: Immune cell profiling**

9 (A) Complete blood counts of all blood samples analyzed (B) Gating strategy for  
10 characterization of innate immune cell populations from PBMC. (C-E) Bar graphs  
11 comparing frequencies of total (C) monocytes, (D) dendritic cells, and (E) NK  
12 cells within PBMC. (F-G) Comparing frequencies of (F) myeloid DCs subsets, (G)  
13 plasmacytoid DCs, and (H) NK cell subsets. Levels of significance: \*-  $p < 0.05$ , \*\* -  
14  $p < 0.01$ .

### 15 **Supplementary Figure 3: Phenotyping of adaptive immune cells (A-C)**

16 Percentages of total (A) B cells, (B) CD4+ T cells, and (C) CD8+ T cells within  
17 PBMC. (D-F) Relative abundances of naïve and memory subpopulations with (D)  
18 B cells, (E) CD4+ T cells, and (F) CD8+ T cells. Levels of significance: \*-  $p < 0.05$ ,  
19 \*\* -  $p < 0.01$ , \*\*\*\* -  $p < 0.0001$ .

### 20 **Supplementary Figure 4: Cytokine responses to *ex vivo* stimulation. (A)**

21 Gating strategy for measuring frequencies of responding monocytes and T cells  
22 following *ex vivo* stimulation using intracellular cytokine staining. (B-D) Violin  
23 plots of responding T cells following CD3/CD28 stimulation. (B) IL-2 (above) and

1 IL-4 (below) responses in CD4+ T cells. IFN $\gamma$  (above) and TNF $\alpha$  (below)  
2 responses in (C) CD4+ and (D) CD8+ T cells.

3 **Supplementary Figure 5: Baseline transcriptional differences with**  
4 **pregnancy.** (A-B) Scatter plot depiction of normalized transcript counts (TPM) on  
5 a log<sub>2</sub> scale from resting monocyte at T1 and T3 (projected on X and Y axes  
6 respectively) obtained from (A) lean and (B) obese groups. Only genes with  
7 significant expression differences (p<0.001) are annotated. (C) UMAP  
8 visualization of PBMC isolated from lean mothers (n=2) and mothers with obesity  
9 (n=2) at delivery time point. Live cells were enriched using FACS and profiled  
10 using droplet based single cell RNA sequencing. (D) Feature plots of  
11 characteristic markers to delineate monocyte subsets based on their levels of  
12 expression as gradient of purple. (E) Pseudotime ordering of monocytes (left)  
13 revealing progressive shifts in cellular states with pregravid obesity (right). (F-G)  
14 Violin plots comparing expression of genes involved in (F) type-I interferon  
15 signaling across different clusters, highlighting select (G) interferon stimulated  
16 genes (ISGs) significantly down-regulated with maternal obesity.

17 **Supplementary Figure 6: Profiling transcriptional responses to LPS.**

18 (A) Gating strategy for assessment of purity of monocytes following magnetic  
19 bead separation. (B) Comparing LPS responsive DEG in lean and obese group  
20 at T1 and (C) T3.

21 **Supplementary Figure 7: Epigenetic adaptations with pregnancy and**  
22 **obesity**



1 (A) Functional enrichment of genes regulated by promoter associated and (B)  
2 intergenic DAR open in lean group at T3 relative to T1 ( $FC > 2$ ). Genes associated  
3 with these regions are quantified next to each GO term. (C) Genomic contexts of  
4 DAR comparing monocyte ATAC peaks from leans and obese group at T1. (D-E)  
5 WashU Epigenome tracks for (D) *IL6ST* and (E) *CD80* locus with promoter  
6 vicinity highlighted in yellow. (F) Gene ontologies of intergenic associations  
7 identified by GREAT as significantly open in obese group relative to lean group at  
8 T3. (G) WashU Epigenome tracks for *EHMT1* significantly more open with  
9 obesity.

10 **Supplementary Figure 8: Functional rewiring of monocytes with maternal**  
11 **obesity at term**

12 (A) Contour plots of CellROX signal from monocytes gated in lean and obese  
13 samples. NAC and TBHP treated monocytes serve as negative and positive  
14 controls respectively. (B) Bar graphs comparing surface expression of HLA-DR  
15 and secreted levels of M1 associated chemokines (C) CXCL9 and (D) CXCL11  
16 following LPS and  $IFN\gamma$  stimulation on day 7. (E) Bar graphs comparing surface  
17 expression of M2 associated markers CD163 and (F) CD209, and M2-associated  
18 chemokine (G) CCL11 (eotaxin) and growth factor (H) PDGF. Levels of  
19 significance: \* -  $p < 0.05$ ; \*\*\* -  $p < 0.001$ ; \*\*\*\*- $p < 0.0001$ . Bars represent medians  
20 and interquartile ranges.

21

1 **Table 1: Cohort characteristics**

|                                                | <b>Lean (n=69)</b> | <b>Obese (n=48)</b> | <b>P-Value</b> |
|------------------------------------------------|--------------------|---------------------|----------------|
| <b>Age (y)</b>                                 | 32.8±4.7           | 29.4±9              | n.s            |
| <b>Race:</b> American<br>Indian/Alaskan Native | 2                  | 4                   |                |
| <b>Race:</b> Asian American                    | 6                  | 1                   |                |
| <b>Race:</b> African American                  | 0                  | 6                   |                |
| <b>Race:</b> Pacific Islander                  | 2                  | 0                   |                |
| <b>Race:</b> White/Caucasian                   | 64                 | 37                  |                |
| <b>Ethnicity:</b> Hispanic                     | 6                  | 8                   |                |
| <b>BMI (kg/m<sup>2</sup>)</b>                  | 21.9±1.7           | 35.2±5.2            | <0.0001        |
| <b>Fat mass at 12 weeks<br/>(kg)</b>           | 17.3±4.1           | 42.6±11.4           | <0.0001        |
| <b>Fat mass at 37 weeks<br/>(kg)</b>           | 22±5.5             | 44.2±11.1           | <0.0001        |
| <b>GWG (kg)</b>                                | 15±4.5             | 10.4±7.6            | <0.001         |

2

## 1 REFERENCES

- 2 Acosta, C.D., Bhattacharya, S., Tuffnell, D., Kurinczuk, J.J., and Knight, M.  
3 (2012). Maternal sepsis: a Scottish population-based case-control study. *BJOG*  
4 *119*, 474-483.
- 5 Aghaeepour, N., Ganio, E.A., McIlwain, D., Tsai, A.S., Tingle, M., Van Gassen,  
6 S., Gaudilliere, D.K., Baca, Q., McNeil, L., Okada, R., *et al.* (2017). An immune  
7 clock of human pregnancy. *Sci Immunol* *2*.
- 8 Aghaeepour, N., Lehallier, B., Baca, Q., Ganio, E.A., Wong, R.J., Ghaemi, M.S.,  
9 Culos, A., El-Sayed, Y.Y., Blumenfeld, Y.J., Druzin, M.L., *et al.* (2018). A  
10 proteomic clock of human pregnancy. *Am J Obstet Gynecol* *218*, 347 e341-347  
11 e314.
- 12 Aune, D., Saugstad, O.D., Henriksen, T., and Tonstad, S. (2014). Maternal body  
13 mass index and the risk of fetal death, stillbirth, and infant death: a systematic  
14 review and meta-analysis. *JAMA* *311*, 1536-1546.
- 15 Baban, R.S., Ali, N.M., and Al-Moayed, H.A. (2010). Serum leptin and insulin  
16 hormone level in recurrent pregnancy loss. *Oman Med J* *25*, 203-207.
- 17 Basu, S., Haghiac, M., Surace, P., Challier, J.C., Guerre-Millo, M., Singh, K.,  
18 Waters, T., Minium, J., Presley, L., Catalano, P.M., and Hauguel-de Mouzon, S.  
19 (2011a). Pregravid obesity associates with increased maternal endotoxemia and  
20 metabolic inflammation. *Obesity (Silver Spring)* *19*, 476-482.
- 21 Basu, S., Leahy, P., Challier, J.C., Minium, J., Catalano, P., and Hauguel-de  
22 Mouzon, S. (2011b). Molecular phenotype of monocytes at the maternal-fetal  
23 interface. *Am J Obstet Gynecol* *205*, 265 e261-268.
- 24 Ben Amara, A., Gorvel, L., Baulan, K., Derain-Court, J., Buffat, C., Verollet, C.,  
25 Textoris, J., Ghigo, E., Bretelle, F., Maridonneau-Parini, I., and Mege, J.L. (2013).  
26 Placental macrophages are impaired in chorioamnionitis, an infectious pathology  
27 of the placenta. *J Immunol* *191*, 5501-5514.
- 28 Bianchi, D.W., Zickwolf, G.K., Weil, G.J., Sylvester, S., and DeMaria, M.A. (1996).  
29 Male fetal progenitor cells persist in maternal blood for as long as 27 years  
30 postpartum. *Proc Natl Acad Sci U S A* *93*, 705-708.
- 31 Catalano, P.M., Presley, L., Minium, J., and Hauguel-de Mouzon, S. (2009).  
32 Fetuses of obese mothers develop insulin resistance in utero. *Diabetes Care* *32*,  
33 1076-1080.
- 34 Challier, J.C., Basu, S., Bintein, T., Minium, J., Hotmire, K., Catalano, P.M., and  
35 Hauguel-de Mouzon, S. (2008). Obesity in pregnancy stimulates macrophage  
36 accumulation and inflammation in the placenta. *Placenta* *29*, 274-281.
- 37 Chandra, S., Tripathi, A.K., Mishra, S., Amzarul, M., and Vaish, A.K. (2012).  
38 Physiological changes in hematological parameters during pregnancy. *Indian J*  
39 *Hematol Blood Transfus* *28*, 144-146.
- 40 Christian, L.M., and Porter, K. (2014). Longitudinal changes in serum  
41 proinflammatory markers across pregnancy and postpartum: effects of maternal  
42 body mass index. *Cytokine* *70*, 134-140.
- 43 Chu, S.Y., Callaghan, W.M., Kim, S.Y., Schmid, C.H., Lau, J., England, L.J., and  
44 Dietz, P.M. (2007). Maternal obesity and risk of gestational diabetes mellitus.  
45 *Diabetes Care* *30*, 2070-2076.

- 1 Cnattingius, S., Villamor, E., Johansson, S., Edstedt Bonamy, A.K., Persson, M.,  
2 Wikstrom, A.K., and Granath, F. (2013). Maternal obesity and risk of preterm  
3 delivery. *JAMA* 309, 2362-2370.
- 4 Conner, S.N., Verticchio, J.C., Tuuli, M.G., Odibo, A.O., Macones, G.A., and  
5 Cahill, A.G. (2014). Maternal obesity and risk of postcesarean wound  
6 complications. *Am J Perinatol* 31, 299-304.
- 7 Dos Santos, C.O., Dolzhenko, E., Hodges, E., Smith, A.D., and Hannon, G.J.  
8 (2015). An epigenetic memory of pregnancy in the mouse mammary gland. *Cell*  
9 *Rep* 11, 1102-1109.
- 10 Faas, M.M., and de Vos, P. (2017). Uterine NK cells and macrophages in  
11 pregnancy. *Placenta* 56, 44-52.
- 12 Faas, M.M., Spaans, F., and De Vos, P. (2014). Monocytes and macrophages in  
13 pregnancy and pre-eclampsia. *Front Immunol* 5, 298.
- 14 Flegal, K.M., Kruszon-Moran, D., Carroll, M.D., Fryar, C.D., and Ogden, C.L.  
15 (2016). Trends in Obesity Among Adults in the United States, 2005 to 2014.  
16 *JAMA* 315, 2284-2291.
- 17 Friis, C.M., Paasche Roland, M.C., Godang, K., Ueland, T., Tanbo, T., Bollerslev,  
18 J., and Henriksen, T. (2013). Adiposity-related inflammation: effects of pregnancy.  
19 *Obesity (Silver Spring)* 21, E124-130.
- 20 Gamliel, M., Goldman-Wohl, D., Isaacson, B., Gur, C., Stein, N., Yamin, R.,  
21 Berger, M., Grunewald, M., Keshet, E., Rais, Y., *et al.* (2018). Trained Memory of  
22 Human Uterine NK Cells Enhances Their Function in Subsequent Pregnancies.  
23 *Immunity* 48, 951-962 e955.
- 24 Gomez-Lopez, N., StLouis, D., Lehr, M.A., Sanchez-Rodriguez, E.N., and  
25 Arenas-Hernandez, M. (2014). Immune cells in term and preterm labor. *Cell Mol*  
26 *Immunol* 11, 571-581.
- 27 Grondman, I., Arts, R.J.W., Koch, R.M., Leijte, G.P., Gerretsen, J., Bruse, N.,  
28 Kempkes, R.W.M., Ter Horst, R., Kox, M., Pickkers, P., *et al.* (2019). Frontline  
29 Science: Endotoxin-induced immunotolerance is associated with loss of  
30 monocyte metabolic plasticity and reduction of oxidative burst. *J Leukoc Biol* 106,  
31 11-25.
- 32 Hadley, E.E., Discacciati, A., Costantine, M.M., Munn, M.B., Pacheco, L.D.,  
33 Saade, G.R., and Chiossi, G. (2019). Maternal obesity is associated with  
34 chorioamnionitis and earlier indicated preterm delivery among expectantly  
35 managed women with preterm premature rupture of membranes. *J Matern Fetal*  
36 *Neonatal Med* 32, 271-278.
- 37 Huda, S.S., Forrest, R., Paterson, N., Jordan, F., Sattar, N., and Freeman, D.J.  
38 (2014). In preeclampsia, maternal third trimester subcutaneous adipocyte  
39 lipolysis is more resistant to suppression by insulin than in healthy pregnancy.  
40 *Hypertension* 63, 1094-1101.
- 41 Kay, A.W., Fukuyama, J., Aziz, N., Dekker, C.L., Mackey, S., Swan, G.E., Davis,  
42 M.M., Holmes, S., and Blish, C.A. (2014). Enhanced natural killer-cell and T-cell  
43 responses to influenza A virus during pregnancy. *Proc Natl Acad Sci U S A* 111,  
44 14506-14511.

- 1 Kim, S.S., Zhu, Y., Grantz, K.L., Hinkle, S.N., Chen, Z., Wallace, M.E., Smarr,  
2 M.M., Epps, N.M., and Mendola, P. (2016). Obstetric and Neonatal Risks Among  
3 Obese Women Without Chronic Disease. *Obstet Gynecol* 128, 104-112.
- 4 Laivuori, H., Kaaja, R., Koistinen, H., Karonen, S.L., Andersson, S., Koivisto, V.,  
5 and Ylikorkala, O. (2000). Leptin during and after preeclamptic or normal  
6 pregnancy: its relation to serum insulin and insulin sensitivity. *Metabolism* 49,  
7 259-263.
- 8 Lampe, R., Kover, A., Szucs, S., Pal, L., Arnyas, E., Adany, R., and Poka, R.  
9 (2015). Phagocytic index of neutrophil granulocytes and monocytes in healthy  
10 and preeclamptic pregnancy. *J Reprod Immunol* 107, 26-30.
- 11 Le Bouteiller, P. (2013). Human decidual NK cells: unique and tightly regulated  
12 effector functions in healthy and pathogen-infected pregnancies. *Front Immunol* 4,  
13 404.
- 14 Le Gars, M., Kay, A.W., Bayless, N.L., Aziz, N., Dekker, C.L., Swan, G.E., Davis,  
15 M.M., and Blish, C.A. (2016). Increased Proinflammatory Responses of  
16 Monocytes and Plasmacytoid Dendritic Cells to Influenza A Virus Infection During  
17 Pregnancy. *J Infect Dis* 214, 1666-1671.
- 18 Luppi, P., Haluszczak, C., Betters, D., Richard, C.A., Trucco, M., and DeLoia, J.A.  
19 (2002a). Monocytes are progressively activated in the circulation of pregnant  
20 women. *J Leukoc Biol* 72, 874-884.
- 21 Luppi, P., Haluszczak, C., Trucco, M., and DeLoia, J.A. (2002b). Normal  
22 pregnancy is associated with peripheral leukocyte activation. *Am J Reprod*  
23 *Immunol* 47, 72-81.
- 24 McLean, M., Hines, R., Polinkovsky, M., Stuebe, A., Thorp, J., and Strauss, R.  
25 (2012). Type of skin incision and wound complications in the obese parturient.  
26 *Am J Perinatol* 29, 301-306.
- 27 Mellembakken, J.R., Aukrust, P., Olafsen, M.K., Ueland, T., Hestdal, K., and  
28 Videm, V. (2002). Activation of leukocytes during the uteroplacental passage in  
29 preeclampsia. *Hypertension* 39, 155-160.
- 30 Mor, G., and Abrahams, V.M. (2003). Potential role of macrophages as  
31 immunoregulators of pregnancy. *Reprod Biol Endocrinol* 1, 119.
- 32 Mor, G., and Cardenas, I. (2010). The immune system in pregnancy: a unique  
33 complexity. *Am J Reprod Immunol* 63, 425-433.
- 34 Mor, G., Cardenas, I., Abrahams, V., and Guller, S. (2011). Inflammation and  
35 pregnancy: the role of the immune system at the implantation site. *Ann N Y Acad*  
36 *Sci* 1221, 80-87.
- 37 Naccasha, N., Gervasi, M.T., Chaiworapongsa, T., Berman, S., Yoon, B.H.,  
38 Maymon, E., and Romero, R. (2001). Phenotypic and metabolic characteristics of  
39 monocytes and granulocytes in normal pregnancy and maternal infection. *Am J*  
40 *Obstet Gynecol* 185, 1118-1123.
- 41 O'Carroll, C., Fagan, A., Shanahan, F., and Carmody, R.J. (2014). Identification  
42 of a Unique Hybrid Macrophage-Polarization State following Recovery from  
43 Lipopolysaccharide Tolerance. *Journal of Immunology* 192, 427-436.
- 44 Park, S.H., Kang, K., Giannopoulou, E., Qiao, Y., Kang, K., Kim, G., Park-Min,  
45 K.H., and Ivashkiv, L.B. (2017). Type I interferons and the cytokine TNF

1 cooperatively reprogram the macrophage epigenome to promote inflammatory  
2 activation. *Nat Immunol* 18, 1104-1116.

3 Polese, B., Gridelet, V., Araklioti, E., Martens, H., Perrier d'Hauterive, S., and  
4 Geenen, V. (2014). The Endocrine Milieu and CD4 T-Lymphocyte Polarization  
5 during Pregnancy. *Front Endocrinol (Lausanne)* 5, 106.

6 Redman, C.W., Tannetta, D.S., Dragovic, R.A., Gardiner, C., Southcombe, J.H.,  
7 Collett, G.P., and Sargent, I.L. (2012). Review: Does size matter? Placental  
8 debris and the pathophysiology of pre-eclampsia. *Placenta* 33 *Suppl*, S48-54.

9 Roberts, K.A., Riley, S.C., Reynolds, R.M., Barr, S., Evans, M., Statham, A., Hor,  
10 K., Jabbour, H.N., Norman, J.E., and Denison, F.C. (2011). Placental structure  
11 and inflammation in pregnancies associated with obesity. *Placenta* 32, 247-254.

12 Robinson, H.E., O'Connell, C.M., Joseph, K.S., and McLeod, N.L. (2005).  
13 Maternal outcomes in pregnancies complicated by obesity. *Obstet Gynecol* 106,  
14 1357-1364.

15 Rosales, C. (2018). Neutrophil: A Cell with Many Roles in Inflammation or  
16 Several Cell Types? *Front Physiol* 9, 113.

17 Sacks, G.P., Clover, L.M., Bainbridge, D.R., Redman, C.W., and Sargent, I.L.  
18 (2001). Flow cytometric measurement of intracellular Th1 and Th2 cytokine  
19 production by human villous and extravillous cytotrophoblast. *Placenta* 22, 550-  
20 559.

21 Sacks, G.P., Redman, C.W., and Sargent, I.L. (2003). Monocytes are primed to  
22 produce the Th1 type cytokine IL-12 in normal human pregnancy: an intracellular  
23 flow cytometric analysis of peripheral blood mononuclear cells. *Clin Exp Immunol*  
24 131, 490-497.

25 Sacks, G.P., Studena, K., Sargent, K., and Redman, C.W. (1998). Normal  
26 pregnancy and preeclampsia both produce inflammatory changes in peripheral  
27 blood leukocytes akin to those of sepsis. *Am J Obstet Gynecol* 179, 80-86.

28 Salim, R., Braverman, M., Teitler, N., Berkovic, I., Suliman, A., and Shalev, E.  
29 (2012). Risk factors for infection following cesarean delivery: an interventional  
30 study. *J Matern Fetal Neonatal Med* 25, 2708-2712.

31 Sebire, N.J., Jolly, M., Harris, J.P., Wadsworth, J., Joffe, M., Beard, R.W., Regan,  
32 L., and Robinson, S. (2001). Maternal obesity and pregnancy outcome: a study of  
33 287,213 pregnancies in London. *Int J Obes Relat Metab Disord* 25, 1175-1182.

34 Sen, S., Iyer, C., and Meydani, S.N. (2014). Obesity during pregnancy alters  
35 maternal oxidant balance and micronutrient status. *J Perinatol* 34, 105-111.

36 Stapleton, R.D., Kahn, J.M., Evans, L.E., Critchlow, C.W., and Gardella, C.M.  
37 (2005). Risk factors for group B streptococcal genitourinary tract colonization in  
38 pregnant women. *Obstet Gynecol* 106, 1246-1252.

39 Stewart, F.M., Freeman, D.J., Ramsay, J.E., Greer, I.A., Caslake, M., and Ferrell,  
40 W.R. (2007). Longitudinal assessment of maternal endothelial function and  
41 markers of inflammation and placental function throughout pregnancy in lean and  
42 obese mothers. *J Clin Endocrinol Metab* 92, 969-975.

43 Sureshchandra, S., Marshall, N.E., Wilson, R.M., Barr, T., Rais, M., Purnell, J.Q.,  
44 Thornburg, K.L., and Messaoudi, I. (2018). Inflammatory Determinants of  
45 Pregravid Obesity in Placenta and Peripheral Blood. *Front Physiol* 9, 1089.

- 1 Torloni, M.R., Betran, A.P., Horta, B.L., Nakamura, M.U., Atallah, A.N., Moron,  
2 A.F., and Valente, O. (2009). Prepregnancy BMI and the risk of gestational  
3 diabetes: a systematic review of the literature with meta-analysis. *Obes Rev* 10,  
4 194-203.
- 5 Wang, Z., Wang, P., Liu, H., He, X., Zhang, J., Yan, H., Xu, D., and Wang, B.  
6 (2013). Maternal adiposity as an independent risk factor for pre-eclampsia: a  
7 meta-analysis of prospective cohort studies. *Obes Rev* 14, 508-521.
- 8 Wolk, K., Kunz, S., Crompton, N.E., Volk, H.D., and Sabat, R. (2003). Multiple  
9 mechanisms of reduced major histocompatibility complex class II expression in  
10 endotoxin tolerance. *J Biol Chem* 278, 18030-18036.
- 11 Zheng, G.X., Terry, J.M., Belgrader, P., Ryvkin, P., Bent, Z.W., Wilson, R.,  
12 Ziraldo, S.B., Wheeler, T.D., McDermott, G.P., Zhu, J., *et al.* (2017). Massively  
13 parallel digital transcriptional profiling of single cells. *Nat Commun* 8, 14049.

14

Figure 1

A.

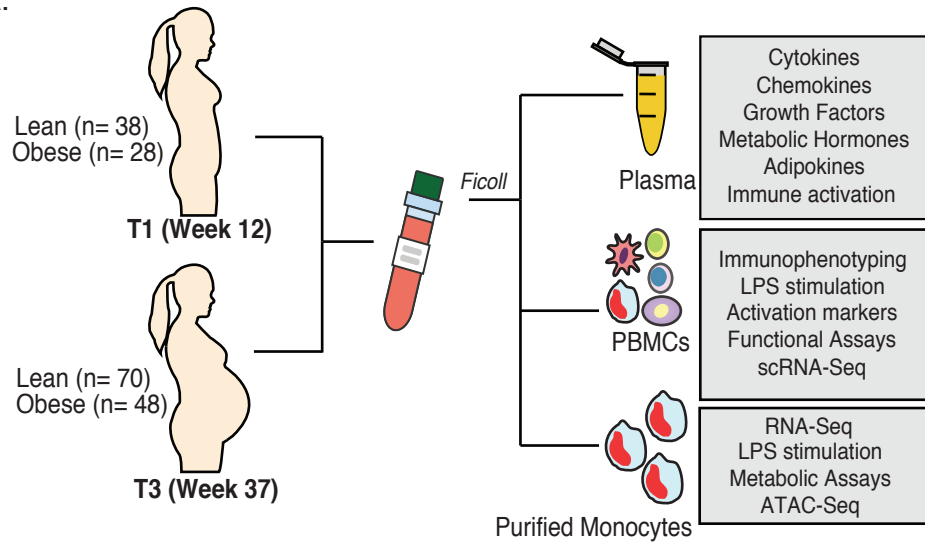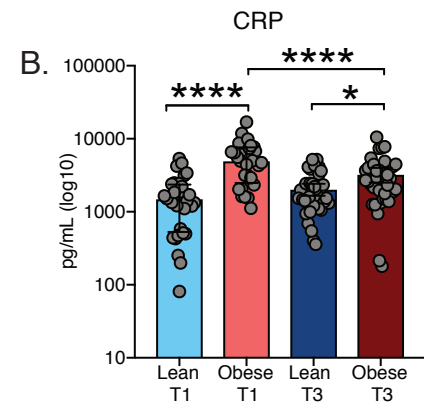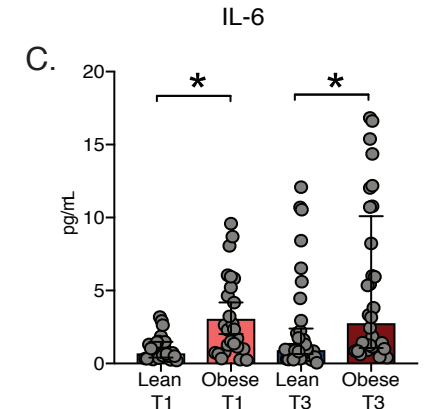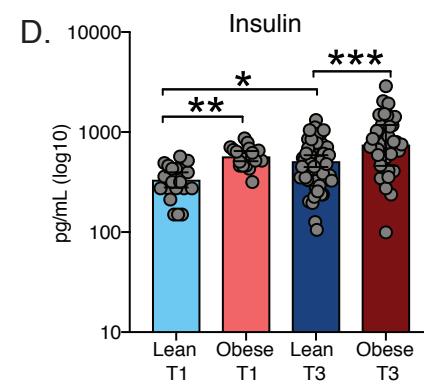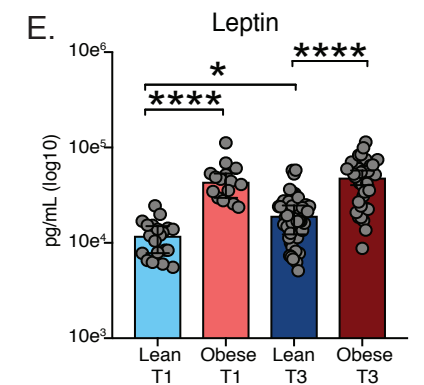

F.

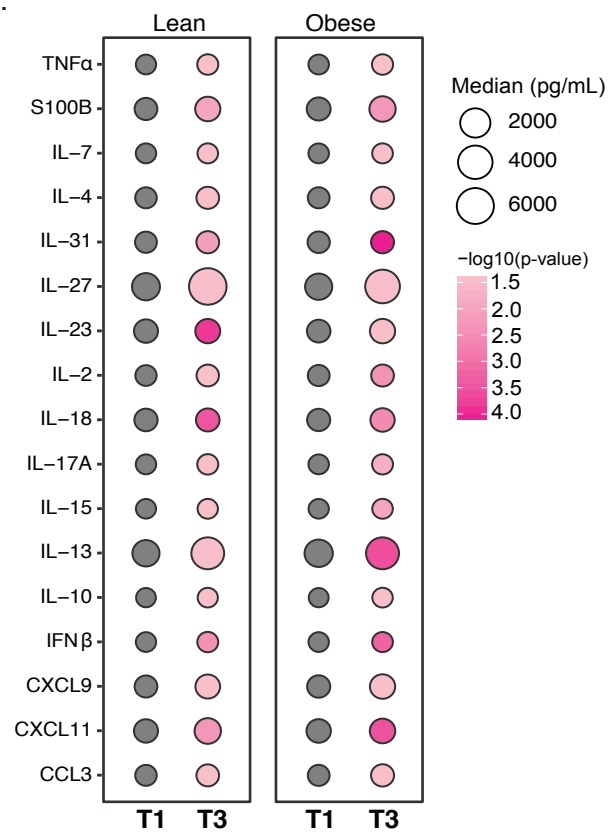

G.

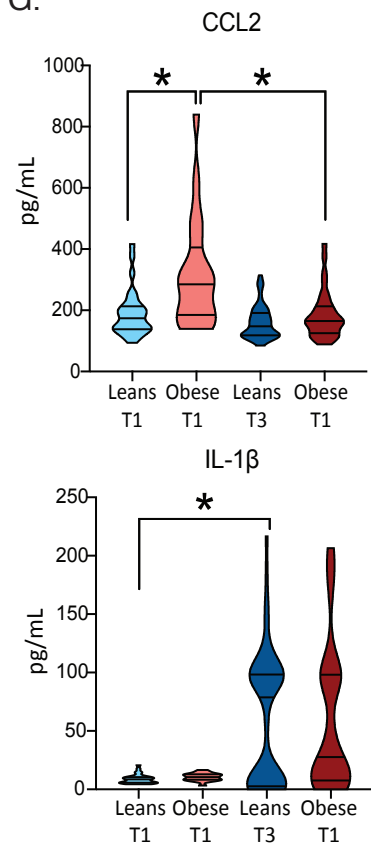

H.

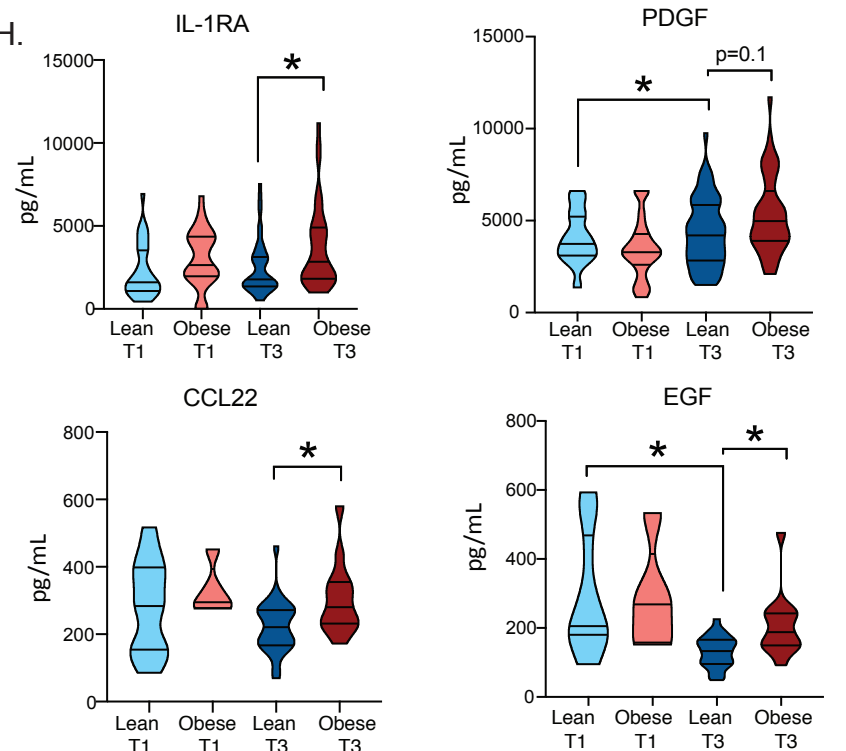



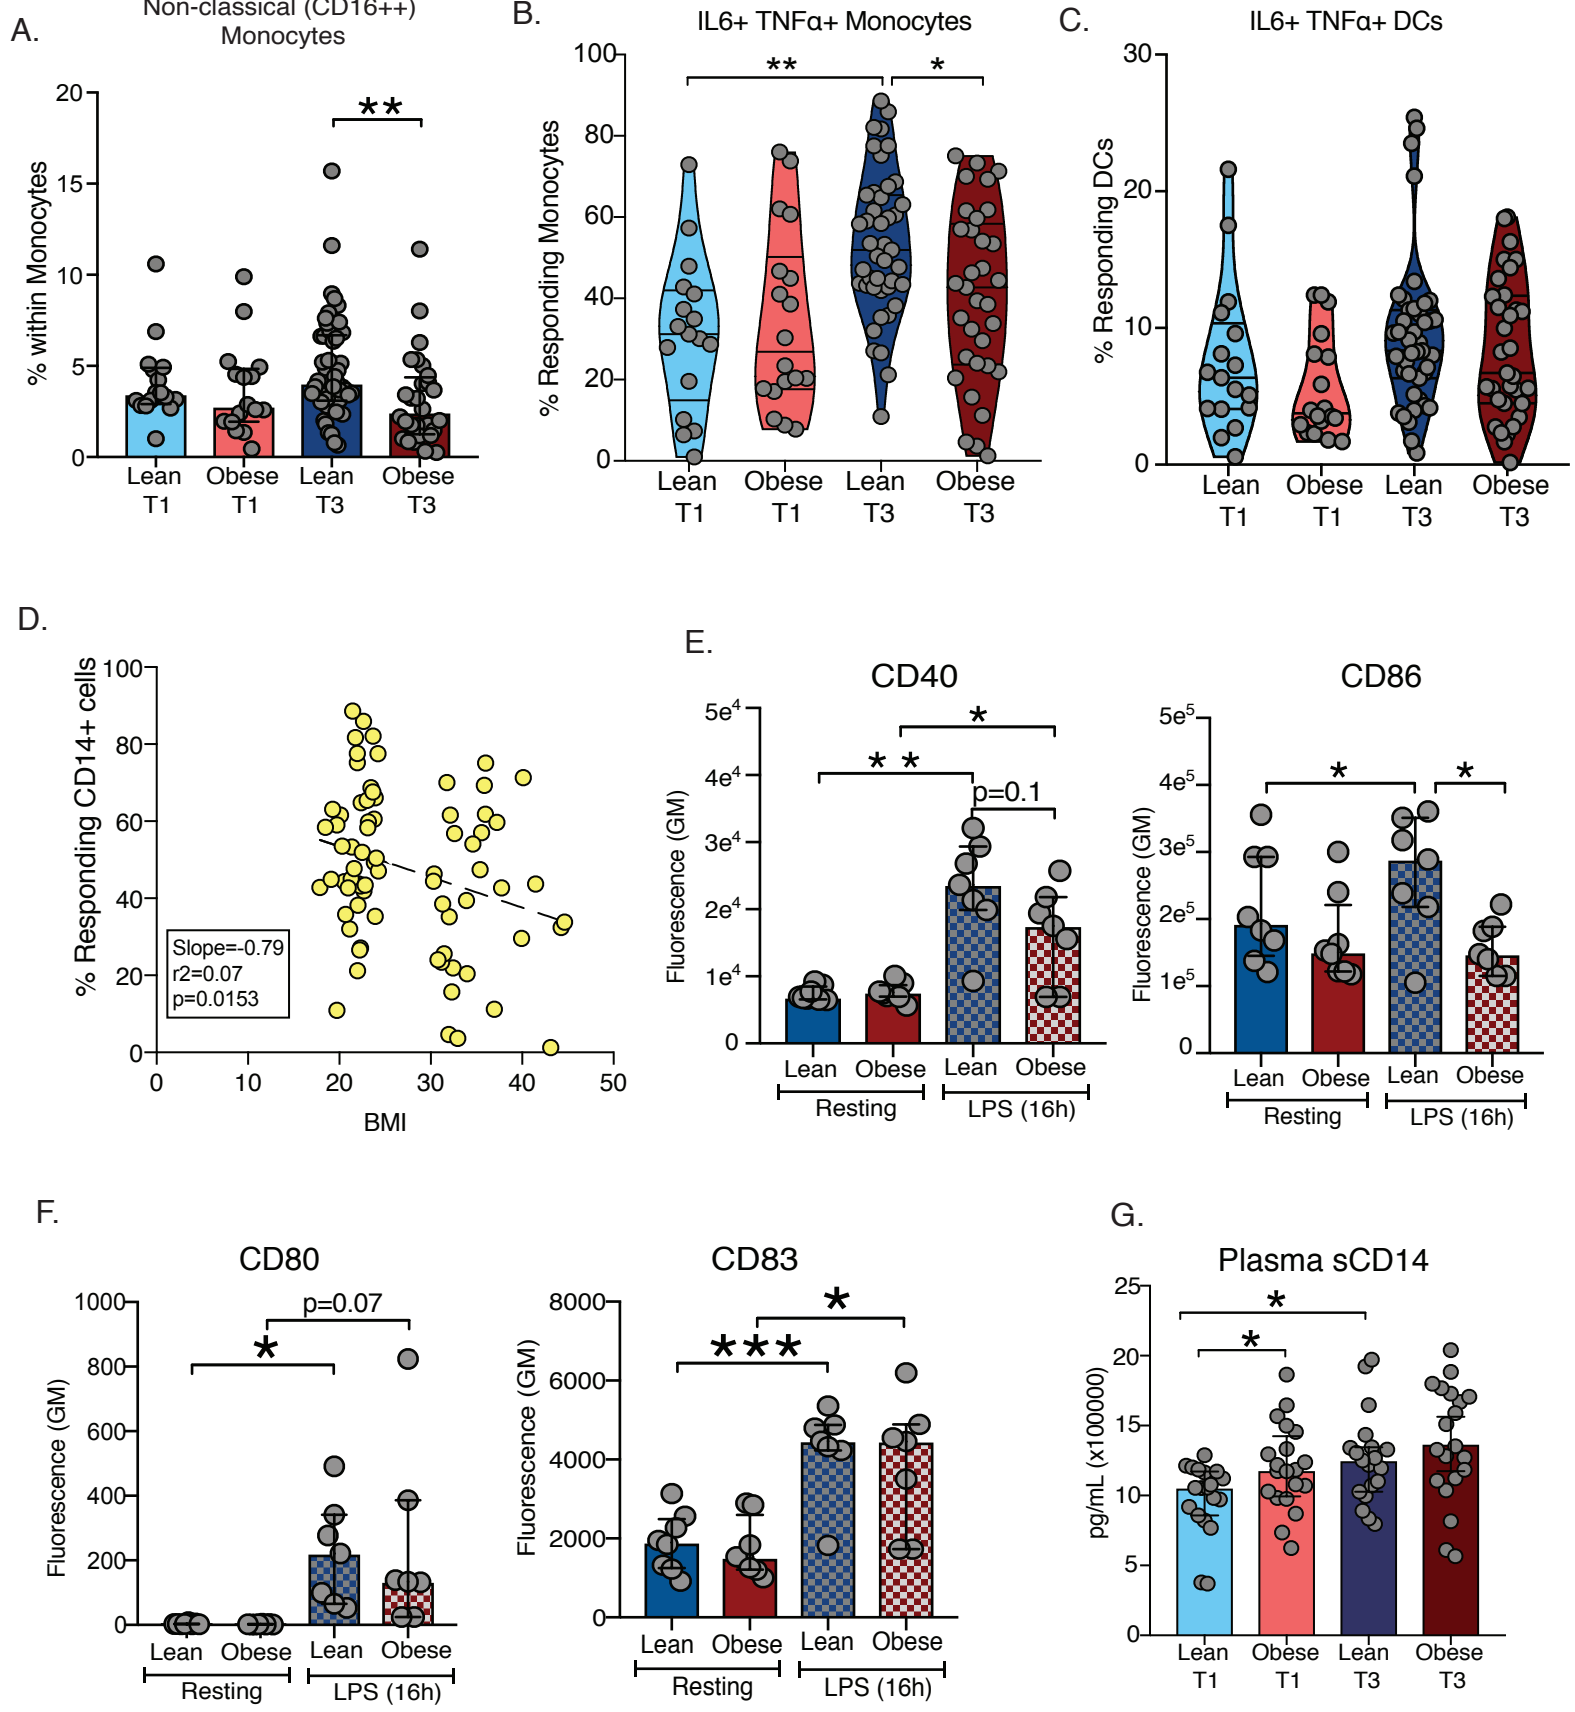

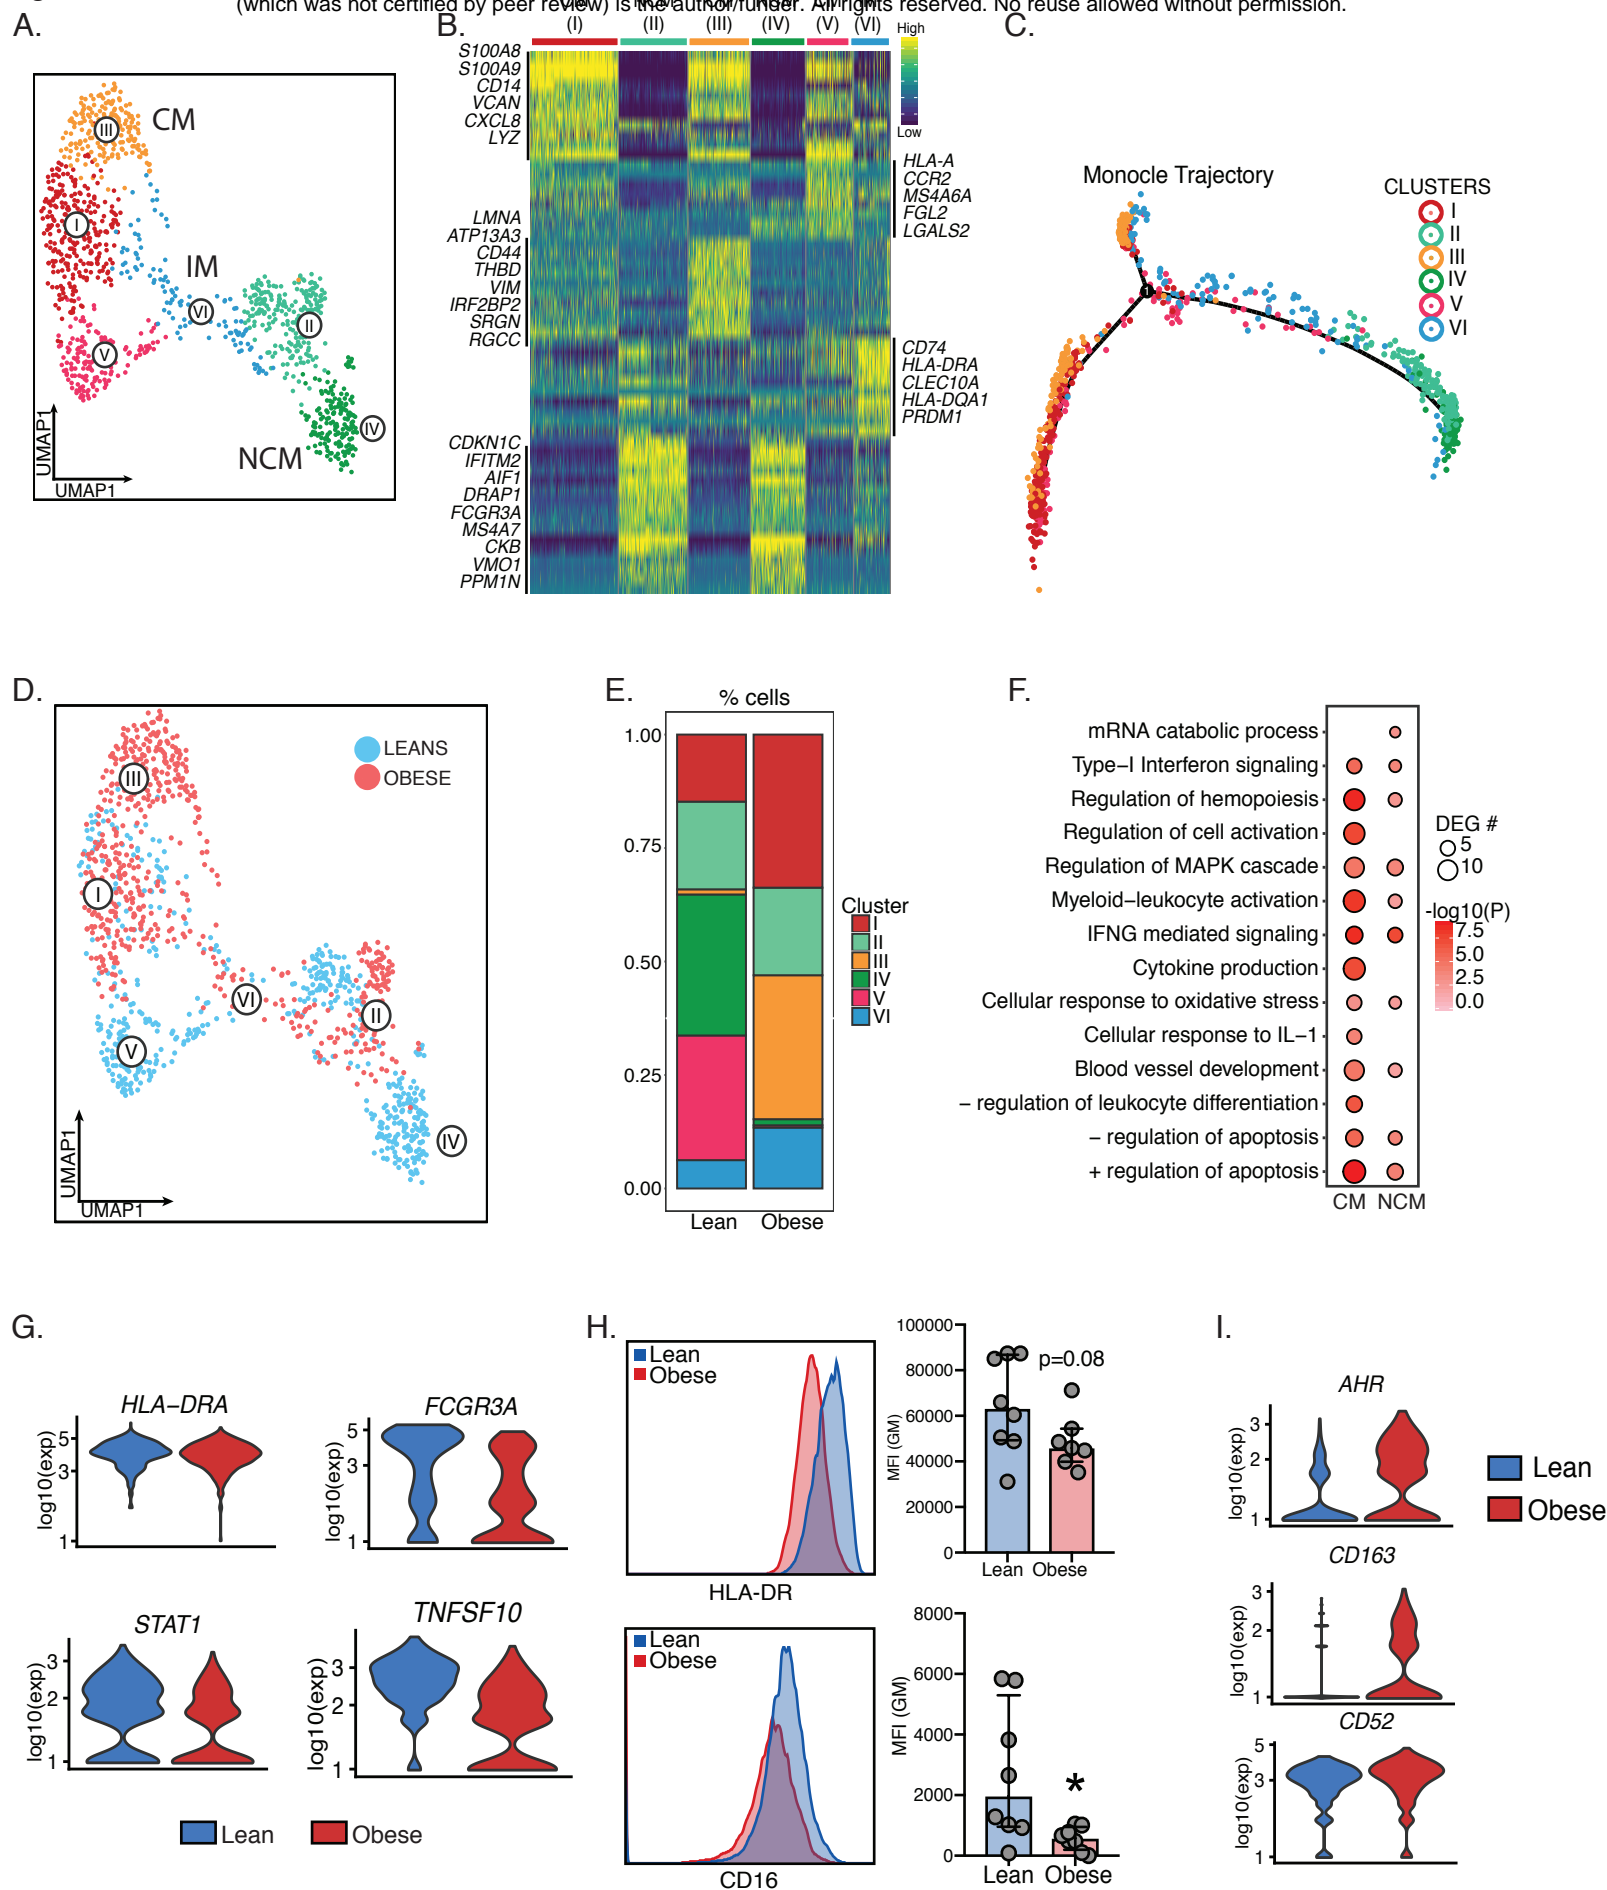

Figure 4

A.

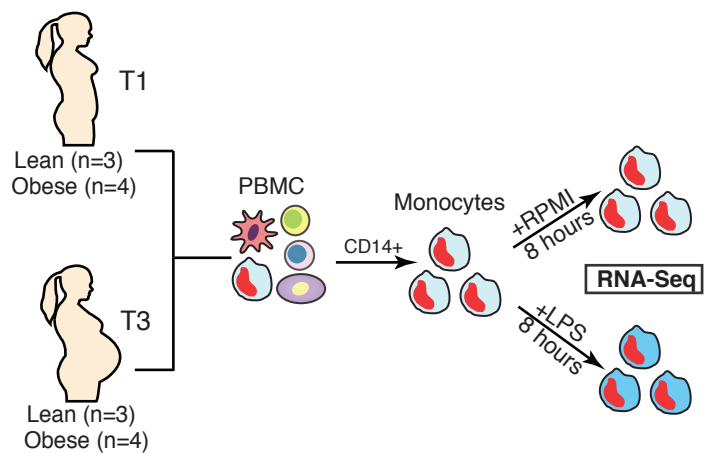

B.

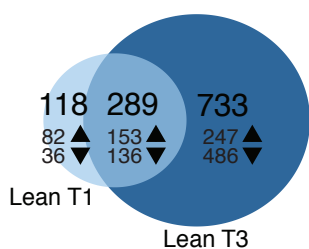

C.

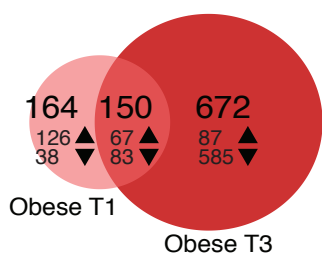

D.

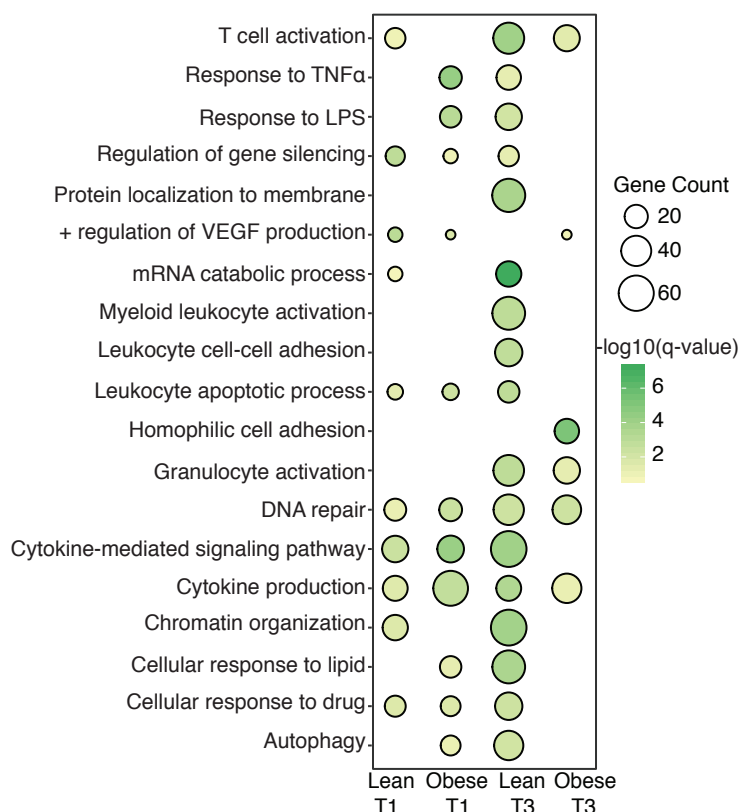

E.

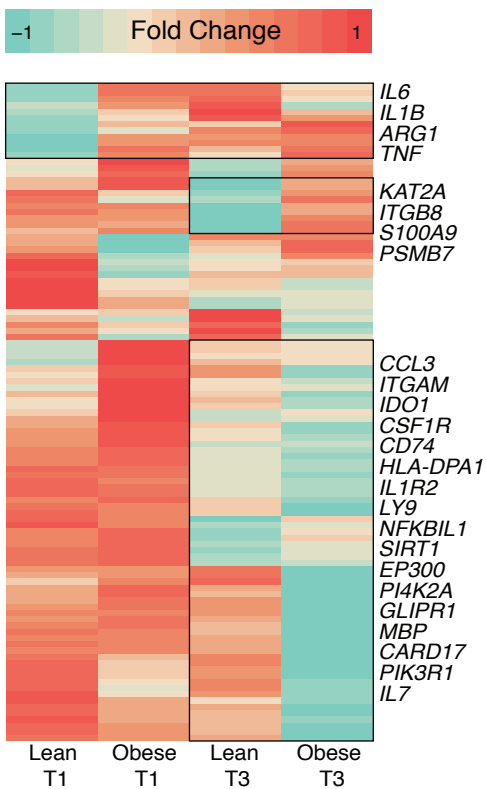

F.

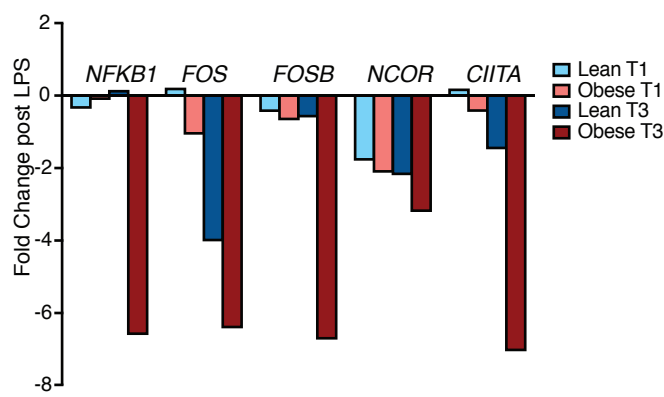

G.

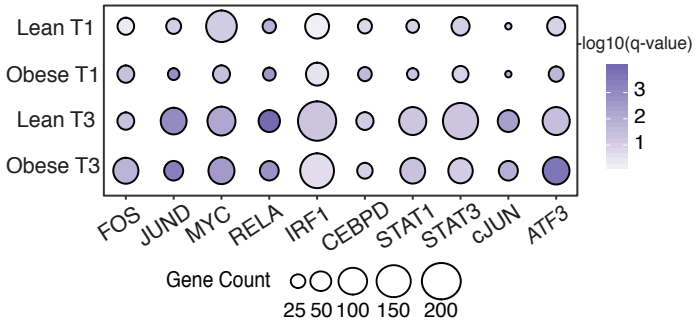

H.

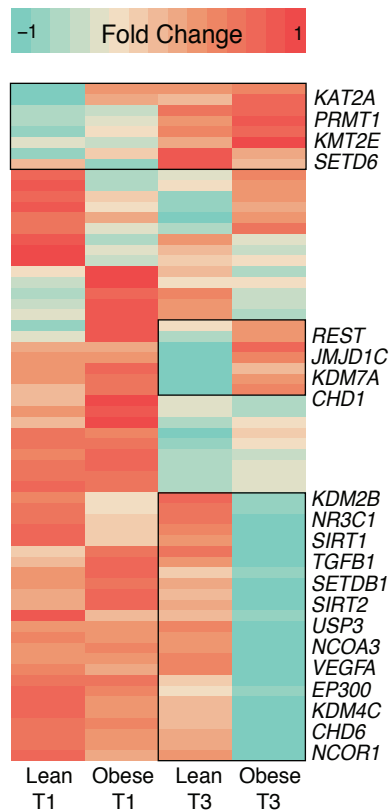

Figure 5

A.

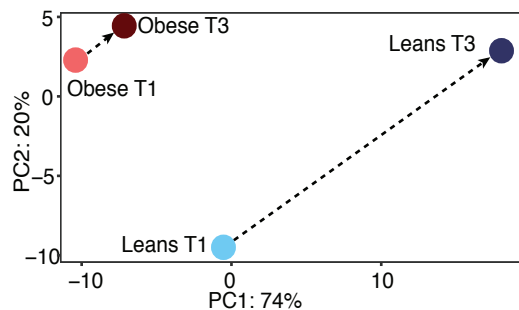

B.

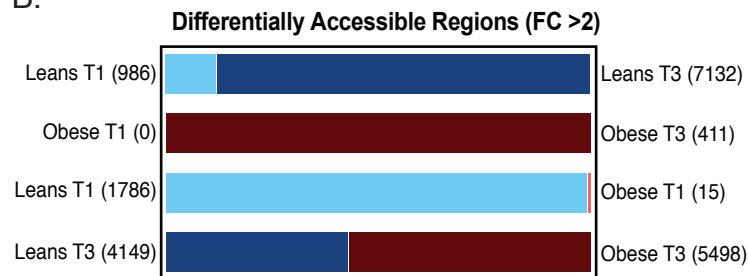

C.

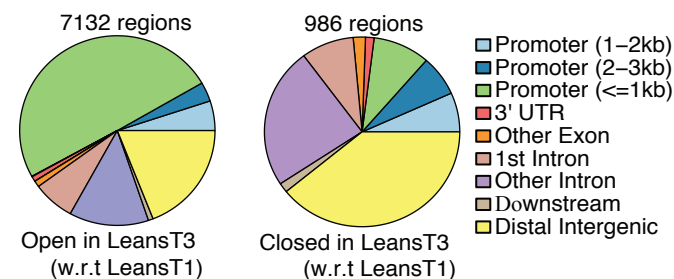

D.

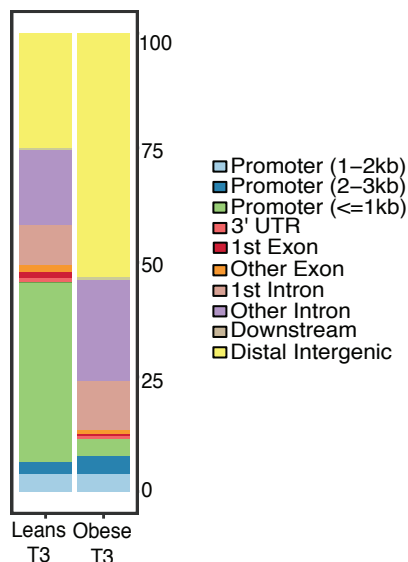

E.

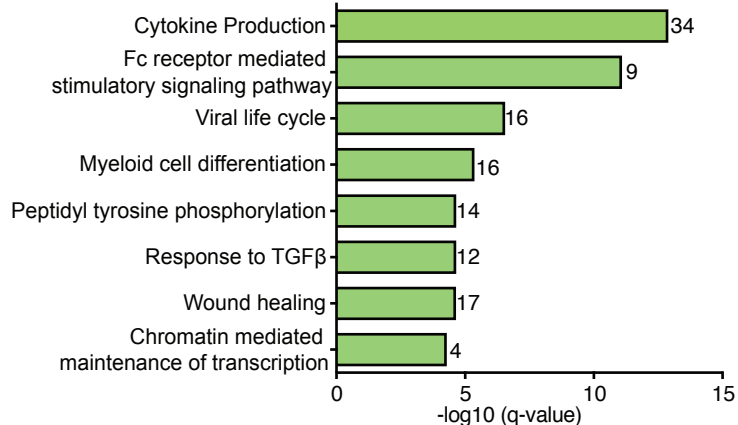

F.

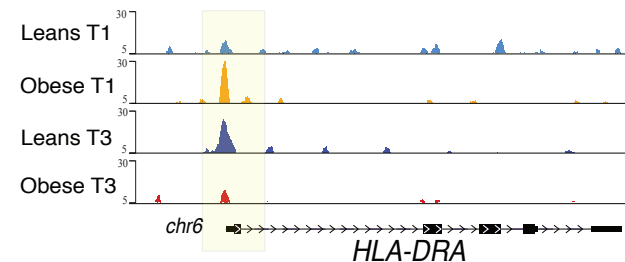

G.

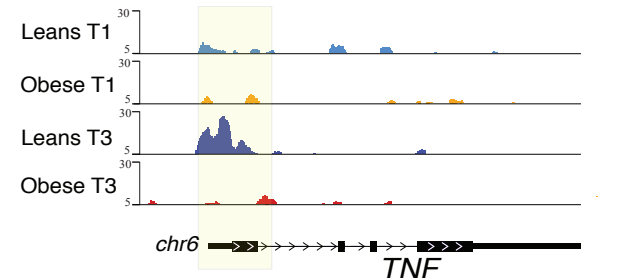

H.

| TF   | Motif        | Enrichment/Background | $-\log_{10}(P)$ | q-value |
|------|--------------|-----------------------|-----------------|---------|
| PU.1 | AGAGGAAGTG   | 12.08% / 4.14%        | 1.146e+2        | 0.00    |
| AP-1 | ATGACTCATC   | 10.26% / 3.62%        | 9.245e+1        | 0.00    |
| NFY  | AGCCAATCGG   | 13.33% / 6.23%        | 7.12e+1         | 0.00    |
| IRF8 | GGAAATGAAAAT | 7.7% / 2.9%           | 3.8e+1          | 0.00    |
| IRF3 | AGTTTCAGTTTC | 4.12% / 1.59%         | 3.232e+1        | 0.00    |
| IRF1 | GAAAATGAAAAT | 2.06% / 0.72%         | 1.98e+1         | 0.00    |

I.

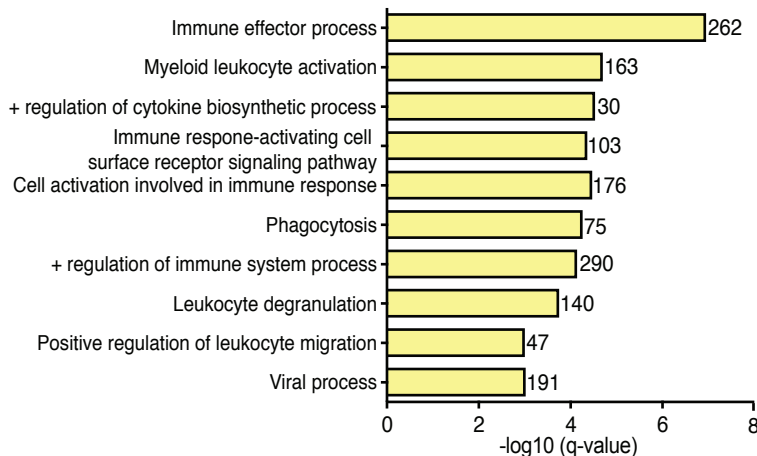

J.

| TF    | Motif         | Enrichment/Background | $-\log_{10}(P)$ | q-value |
|-------|---------------|-----------------------|-----------------|---------|
| STAT6 | TTCCCTAGAA    | 33.03% / 6.22%        | 9.26e+2         | 0.00    |
| SMAD2 | CTGTCTGG      | 36.2% / 12.01%        | 5.56e+2         | 0.00    |
| LXR   | GGGTACTAAGGTC | 5.23% / 1.54%         | 8.89e+1         | 0.00    |

Figure 6

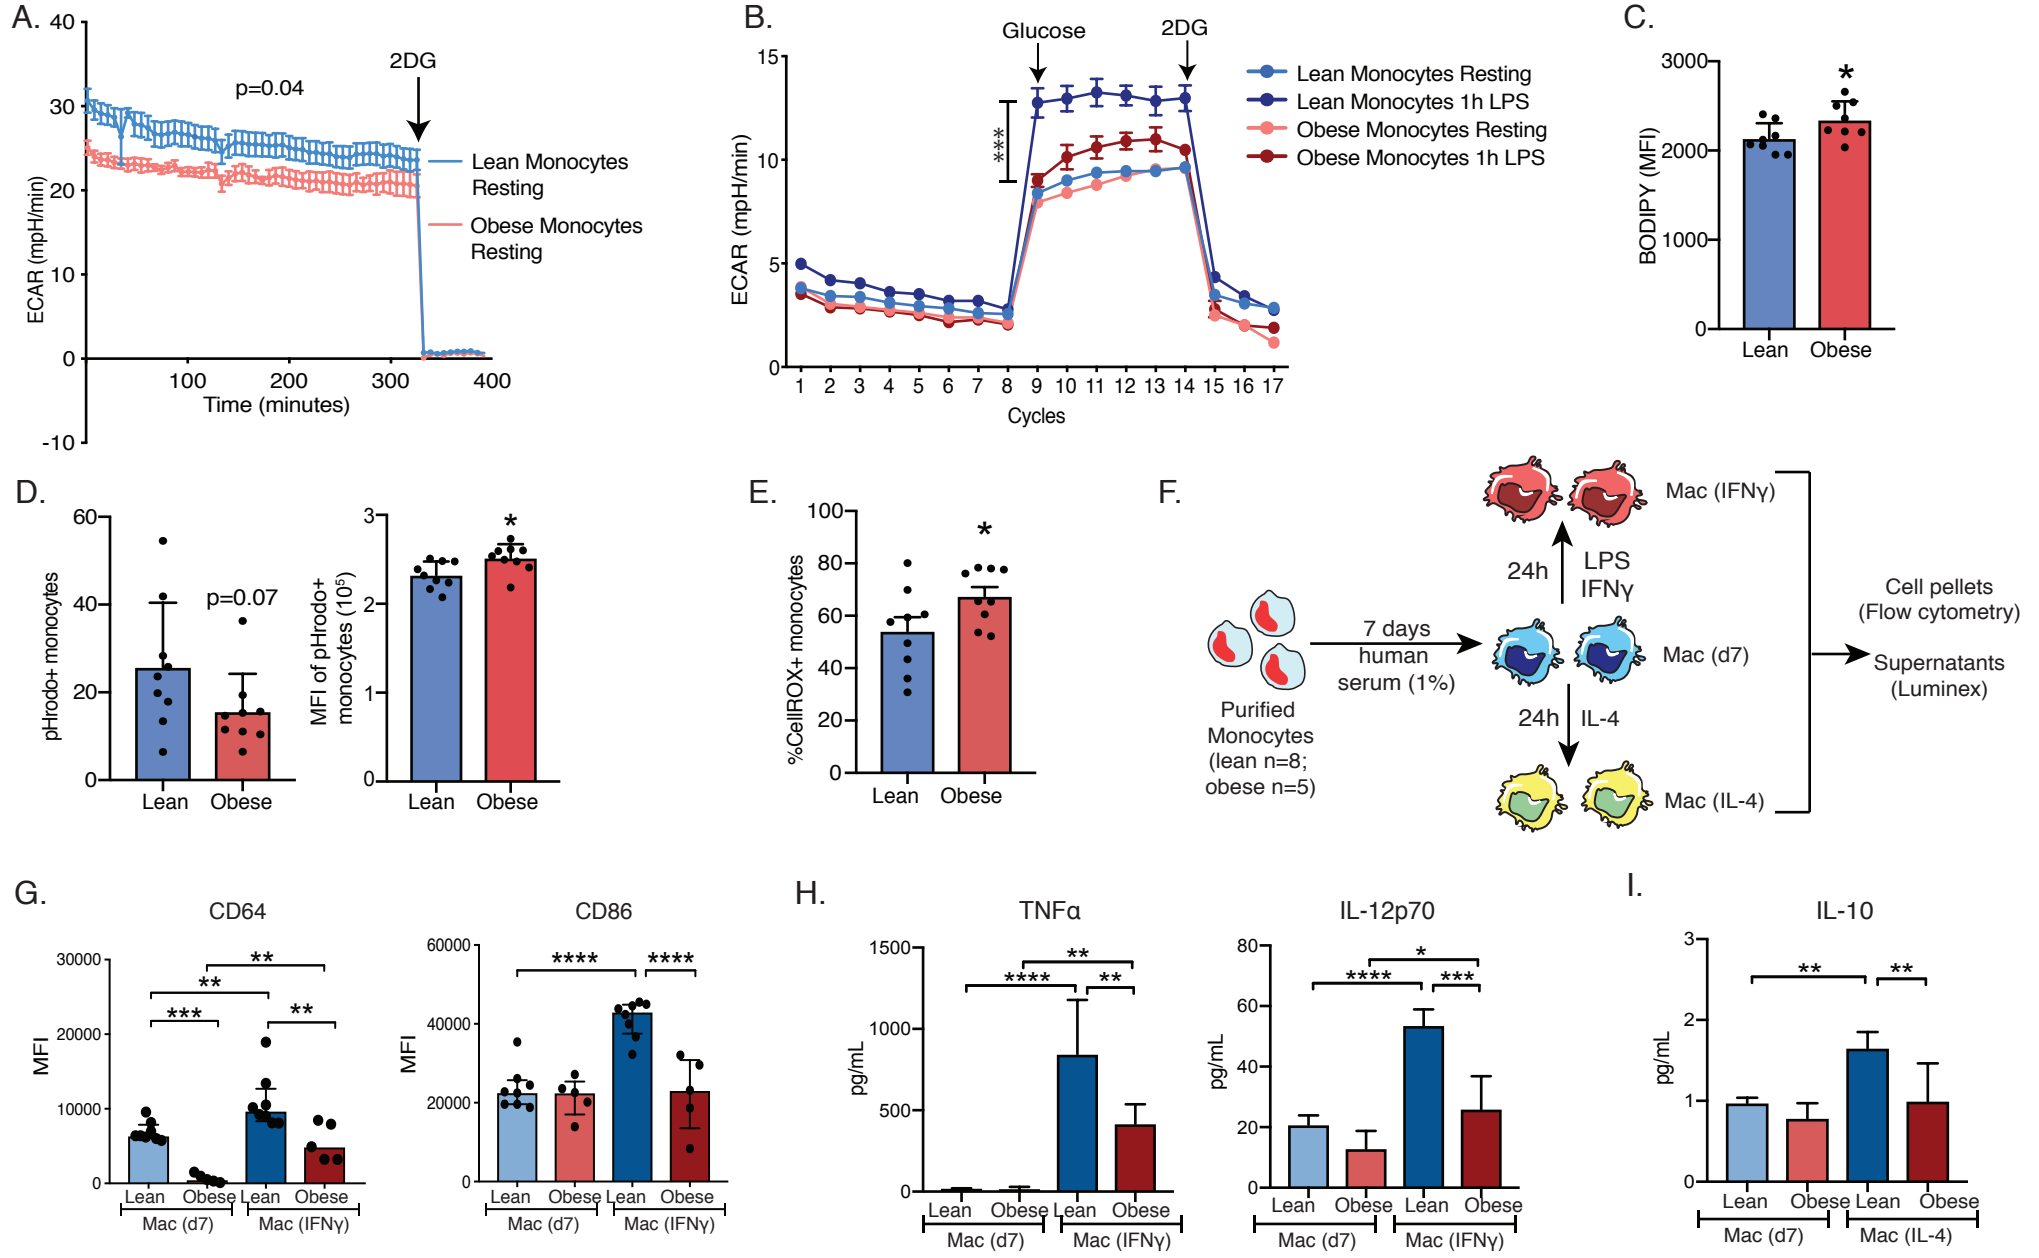

Figure 7

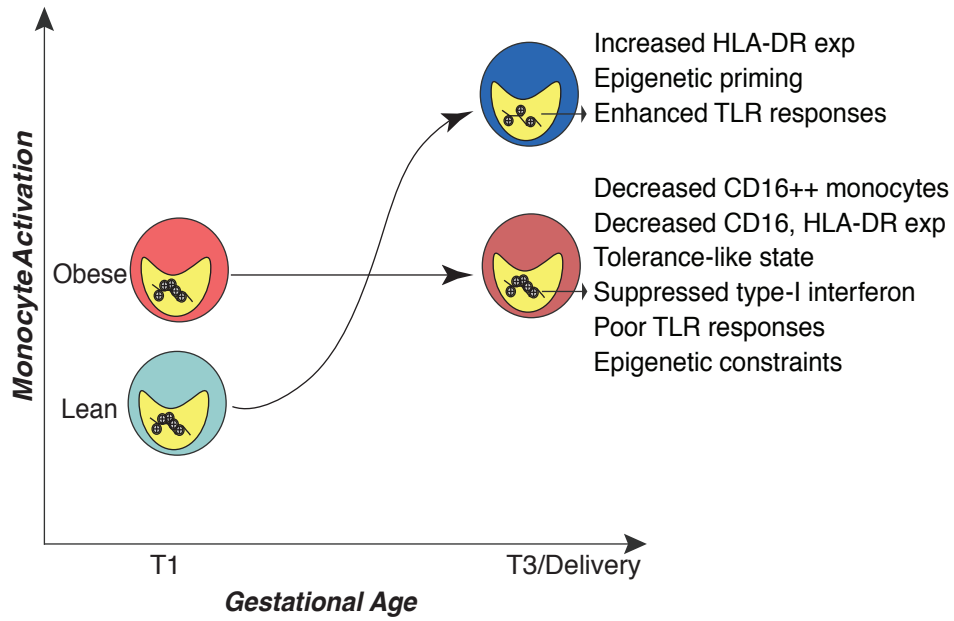

Source: https://www.biorxiv.org/content/10.1101/2020.12.02.409185v1.full.pdf
